# Supplementary material
Source: PubMed Central journal article supplement (PMC5967780)
Supplement: ASN.2017101112SupplementaryData1.pdf [file ASN.2017101112SupplementaryData1.pdf]

## Online Supplement

### Detailed Methods

#### *In Vivo Preclinical Studies*

Animals were housed at the Baker IDI Heart and Diabetes Research Institute and studied according to National Health and Medical Research Council (NHMRC) guidelines in line with international standards. Animals had unrestricted access to water and feed, and were maintained on a 12 hour light/dark cycle on standard mouse chow (Barastoc; Ridley Agriproducts, St Arnaud, VIC, Australia). Six-week-old *ApoE*<sup>-/-</sup> male mice (C57BL/6 background) were rendered diabetic by 5 daily intraperitoneal (I.P.) injections of streptozotocin (Sigma-Aldrich, St Louis, MO) at a dose of 55 mg/kg. *ApoE*<sup>-/-</sup> mice were administered either ethanol (0.1%), LXA<sub>4</sub> (5 ug/kg; Merck, Calbiochem) or Benzo-LXA<sub>4</sub> (1.7 ug/kg; synthesized at University College Dublin, Ireland<sup>1</sup> twice weekly by I.P injection. For the prevention study design, mice were followed for 10 weeks (moderate disease) or 20 weeks (severe disease), and were administered ethanol, LXA<sub>4</sub>, or Benzo-LXA<sub>4</sub> between weeks 1-10 or weeks 1-20, respectively. For the intervention study design, mice were followed for 16 weeks, and were administered ethanol, LXA<sub>4</sub>, or Benzo-LXA<sub>4</sub> between weeks 10-16. Blood glucose levels were monitored weekly after STZ injections for the duration of the studies to confirm the diabetic status of these mice. Only animals with a blood glucose level >15 mmol/l 1 week after the induction of diabetes were included in the study. Ten weeks post induction of diabetes systolic blood pressure was assessed by non-invasive tail cuff system in conscious mice. Urine samples were collected in metabolic cage for 24 hours before the end of the experiment. Glycated haemoglobin (HbA1c) was measured using the Cobas Tina-quant® HbA1c Gen. 3 assay (Roche Diagnostics, VIC, Australia), and creatinine in blood and urine was analysed using the COBAS INTEGRA 400 PLUS (Roche Diagnostics, VIC, Australia), as per the manufacturers guidelines. Total glucose was measured in plasma with a standard commercial enzymatic assay (Beckman Coulter Diagnostics, Gladsville, NSW, Australia). Albumin in urine was measured using the Mouse Albumin ELISA Quantitation Set (Bethyl Laboratories Inc., Montgomery, TX). At study end-point, animals were anaesthetised by sodium pentobarbitone IP (100 mg/kg body weight; Euthatal, Sigma-Aldrich, Castle Hill, NSW, Australia) and organs were rapidly dissected.

#### *In Vitro Studies*

Immortalized human kidney epithelial cells (HK-2; ECACC, Porton Down, UK) were cultured at 37°C in a humidified atmosphere of 95% air/5% CO<sub>2</sub>, and maintained in DMEM-F12 (Sigma-Aldrich, Steinheim, Germany) supplemented with 2 mM L-glutamine, 100 U/ml penicillin, 100 mg/ml streptomycin, 10 ng/ml endothelial growth factor, 36 ng/ml hydrocortisone, 3 pg/ml triiodothyronine, and 5 mg/ml insulin, 5 mg/ml transferrin, and 5 ng/ml selenium (ITS) solution (Sigma-Aldrich). After serum restriction for 24 hours, cells were stimulated with vehicle (0.1% ethanol), LXA<sub>4</sub> (0.1 nM; Merck, Calbiochem), or Benzo-LXA<sub>4</sub> (1nM) for 30 minutes and media was removed and replaced with media with or without TGF-β1 (10 ng/ml; PromoCell GmbH).

#### *Gene expression Analyses by Reverse Transcriptase Quantitative PCR*

RNA was extracted from mouse kidney tissue and HK-2 cells using TRIzol (Ambion). DNase treatment and cDNA synthesis were performed as previously described.<sup>2</sup> Gene expression was determined utilizing TaqMan reagents (Life Technologies) with fluorescence signals being normalized to 18s rRNA or Gapdh utilizing the ddCT method. Probes and primers were designed using a Primer Express program and were purchased from Applied Biosystems (ABI, Foster City, CA, USA). Where no probes were used, Fast SYBR® Green mastermix was employed with gene specific primers. Primer and Probe sequences are detailed in Supplemental Table 8.

#### *Protein Extraction and Western Blot Analyses*

Lysates were harvested in RIPA lysis buffer as previously described<sup>3</sup>. Total protein was estimated using the Bradford assay. For Western blot analysis, antibodies used included the following: Beta-actin (1:20,000; Sigma-Aldrich), CDH1 (1:1,000; BD Biosciences, Oxford, UK), JAG1 (1:2,000; Santa Cruz Biotechnology, Santa Cruz, CA), FN1 (1:2,000; BD Biosciences), CTGF (1:1,000; Santa Cruz Biotechnology, Santa Cruz, CA).

### ***siRNA Transfections***

siGENOME SMARTpool Egr1 siRNA and siGENOME RISC Free control siRNA were purchased from Dharmacon. siRNAs were transfected into HK-2 cells at 60% confluence using Lipofectamine 2000 (Invitrogen, Carlsbad, CA) at a final concentration of 20 nM for 24 hours. Cells were then stimulated with TNF- $\alpha$  or TGF- $\beta$  as previously described.

### ***Histological and Immunohistochemical Staining***

Paraffin sections (4 $\mu$ m) of Kidney were used to stain for Masson's Trichrome as described previously.<sup>4,5</sup> Briefly, 10 representative images per kidney section and single images of aortic arch, thoracic and abdominal aorta segments were quantitatively assessed in a blinded fashion. Quantification of all staining was determined using Image J software (<http://imagej.net/Welcome>).

### ***Evaluation of Renal Pathologic Changes***

Paraffin-embedded sections of mouse kidney with a thickness of 3  $\mu$ m were stained by Periodic acid–Schiff method, and the morphologic changes reflecting the pathologic injuries in glomeruli were evaluated in a blinded fashion in a quantitative manner. Briefly, 20 representative glomerular images at 40x magnification were taken for each section using a light microscope (BX43, Olympus Corporation, Shinjuku, Tokyo) and proportional area of mesangial expansion from PAS stained sections were measured using Image-Pro Analyser 7.0 (Media cybernetics, Rockville, MD). Quantification was determined using Image J software (<http://imagej.net/Welcome>).

### ***Renal RNA-Seq Profiling***

RNA was isolated from kidney Trizol homogenates using the Direct-zol™ RNA MiniPrep Kit (Zymo Research; n=6 kidneys per treatment group). RNA quality was assessed by MultiNA Bioanalyzer (Shimadzu). Illumina HiSeq single end 100 cycle sequencing was performed at the Australian Genome Research Facility (AGRF, Melbourne). Reads were trimmed for quality using a minimum phred value of 20 and minimum length of 18 using Skewer.<sup>6</sup> Reads were mapped with STAR to the mouse genome downloaded from Ensembl (GRCm38).<sup>7</sup> Feature Counts was used to count reads mapped to gene bodies on the correct strand with a minimum mapping quality of 20 using Ensembl genome annotation (Mus musculus.GRCm38.86.gtf).<sup>8</sup> The resulting count matrix underwent differential analysis with the EdgeR package.<sup>9</sup> Transcripts with a false discovery rate (FDR) P-value <0.05 were deemed statistically significant. RNA-seq data is deposited in GEO (GSE107942), and normalized read counts for all transcripts in all samples are available in Supplemental Table 9. Upstream regulator analysis of differentially expressed gene sets was performed using Ingenuity Pathway Analysis Z-score algorithm (Ingenuity Systems, Qiagen). Detailed information on Ingenuity Pathway Analysis is available at [www.qiagen.com](http://www.qiagen.com). Briefly, this analysis examines how many known targets of each transcription regulator (transcription factor, cytokine, enzyme etc..) are present in the RNA-seq dataset, and also compares their direction of change. Relationships between molecules are supported by at least one reference from the literature, from a textbook, or from canonical information stored in the Ingenuity Knowledge Base. For each transcriptional regulator there are two statistical measures: an overlap p-value and an activation z-score. The overlap p-value measures whether there is a statistically significant overlap between the input dataset genes and the genes that are known to be regulated by a transcriptional regulator. It is calculated using a Fisher's Exact Test, and significance is attributed to p-values <0.01. The activation z-score infers the activation state of the transcriptional regulator. This score is assigned based on changes in expression of genes identified in our RNA-seq dataset that are associated with a literature-derived regulation direction (i.e. activating or

inhibiting). The statistical approach here is to define a quantity (z-score) that determines whether an upstream transcription regulator has significantly more ‘activated’ predictions than ‘inhibited’ predictions. A cut-off Z-score of  $\geq 2$  or  $\leq -2$  was deemed significant. Analysis of promoters for enriched TFBSs was performed using Genomatix Matbase (Genomatix). Promoter regions were defined as -1000bp/+100bp from transcription start site. Overrepresentations of TFBSs in promoters of differentially expressed genes was determined against a background population of murine promoters, with a cut-off Z-score  $\geq 2$  or  $\leq -2$  considered statistically significant. NF- $\kappa$ B target genes were downloaded from the NF- $\kappa$ B Transcription Factors Database (<https://www.bu.edu/nf-kb/gene-resources/target-genes/>). Heatmaps of differentially expressed genes were generated using Morpheus (Broad Institute, USA). Publicly available human DKD datasets were downloaded from Nephroseq (<https://nephroseq.org/resource/login.html>).

### **Statistics**

All statistical analyses were performed utilizing GraphPad Prism software. Experiments with only one treatment were assessed by Student’s t-test. Experiments with multiple treatment groups were analysed by one-way ANOVA with post-hoc comparisons of group means performed by Fisher’s least significant different method. A P-value  $\leq 0.05$  was considered statistically significant. Significance between groups is indicated for each figure. Unless otherwise specified, data are shown as mean  $\pm$  S.E.M.

### **Supplemental Figures and Tables**

**Fig. S1.** Masson’s Trichrome staining for ECM accumulation in kidneys.

**Fig. S2.** Smear plots for comparison of global gene expression in RNA-seq data from ApoE<sup>-/-</sup> mouse kidneys.

**Fig. S3.** Compartment-specific expression of gene set differentially expressed in diabetic versus non-diabetic ApoE<sup>-/-</sup> kidneys.

**Fig. S4.** Analysis of tubule compartment specific expression of gene set differentially expressed in diabetic versus non-diabetic ApoE<sup>-/-</sup> kidneys.

**Fig. S5.** Comparison of transcriptional responses between human DKD and diabetic ApoE<sup>-/-</sup> model.

**Fig. S6.** Expression of NF- $\kappa$ B target genes in ApoE<sup>-/-</sup> RNA-seq dataset.

**Fig. S7.** LXs regulate the EGR1 transcriptional network in DKD.

**Fig. S8.** Analysis of tubule compartment specific expression of genes identified as expressed in HK-2 renal tubule epithelial cells.

**Table S1.** Differentially expressed genes between control and diabetic ApoE<sup>-/-</sup> mice.

**Table S2.** Upstream regulator analysis: Control versus diabetic ApoE<sup>-/-</sup> mice.

**Table S3.** Upstream regulator analysis: Diabetic versus Diabetic + LXA<sub>4</sub> or Benzo-LXA<sub>4</sub> treated ApoE<sup>-/-</sup> mice.

**Table S4.** Differentially expressed genes: Diabetic versus Diabetic + LXA<sub>4</sub> treated ApoE<sup>-/-</sup> mice.

**Table S5.** Differentially expressed genes: Diabetic versus Diabetic + Benzo-LXA<sub>4</sub> treated ApoE<sup>-/-</sup> mice.

**Table S6.** TFBS promoter analysis of differentially expressed genes from ApoE<sup>-/-</sup> RNA seq experiment.

**Table S7.** RNA-seq read counts for HK-2 cells in comparison with micro-dissected renal tubule compartments.

**Table S8.** Details of primers and probes used for all quantitative PCR gene expression analysis.

**Table S9.** Normalized read counts for RNA-seq dataset.

**Fig. S1. Masson's Trichrome staining for ECM accumulation in kidneys.**

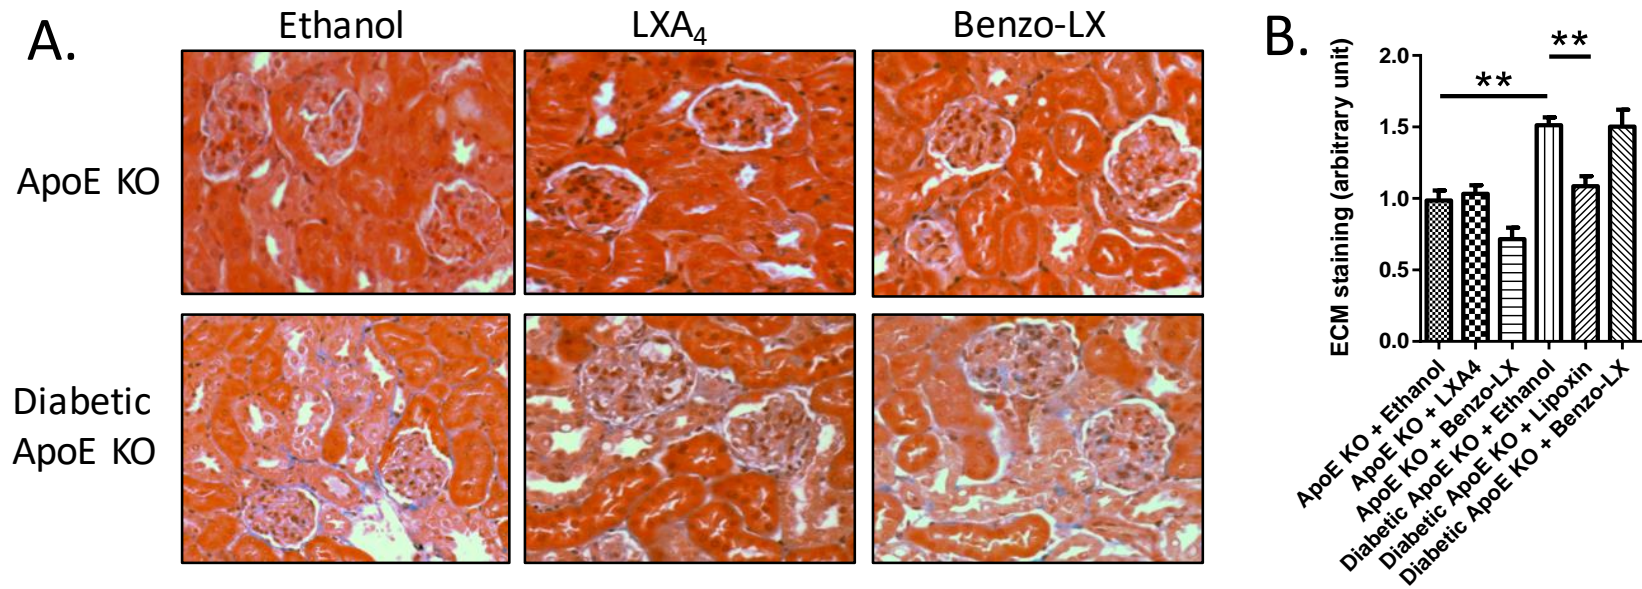

**Fig. S1. (A)** Masson's Trichrome staining for ECM accumulation in kidneys of 20-week diabetic and control ApoE<sup>-/-</sup> mice administered ethanol (0.1%), LXA<sub>4</sub> or Benzo-LXA<sub>4</sub> and **(B)** Quantification of the staining is shown in the bar graph as mean ± SEM (n=8–10/group; \*P<0.05).

**Fig. S2. Smear plots for comparison of global gene expression in RNA-seq data from ApoE<sup>-/-</sup> mouse kidneys.**

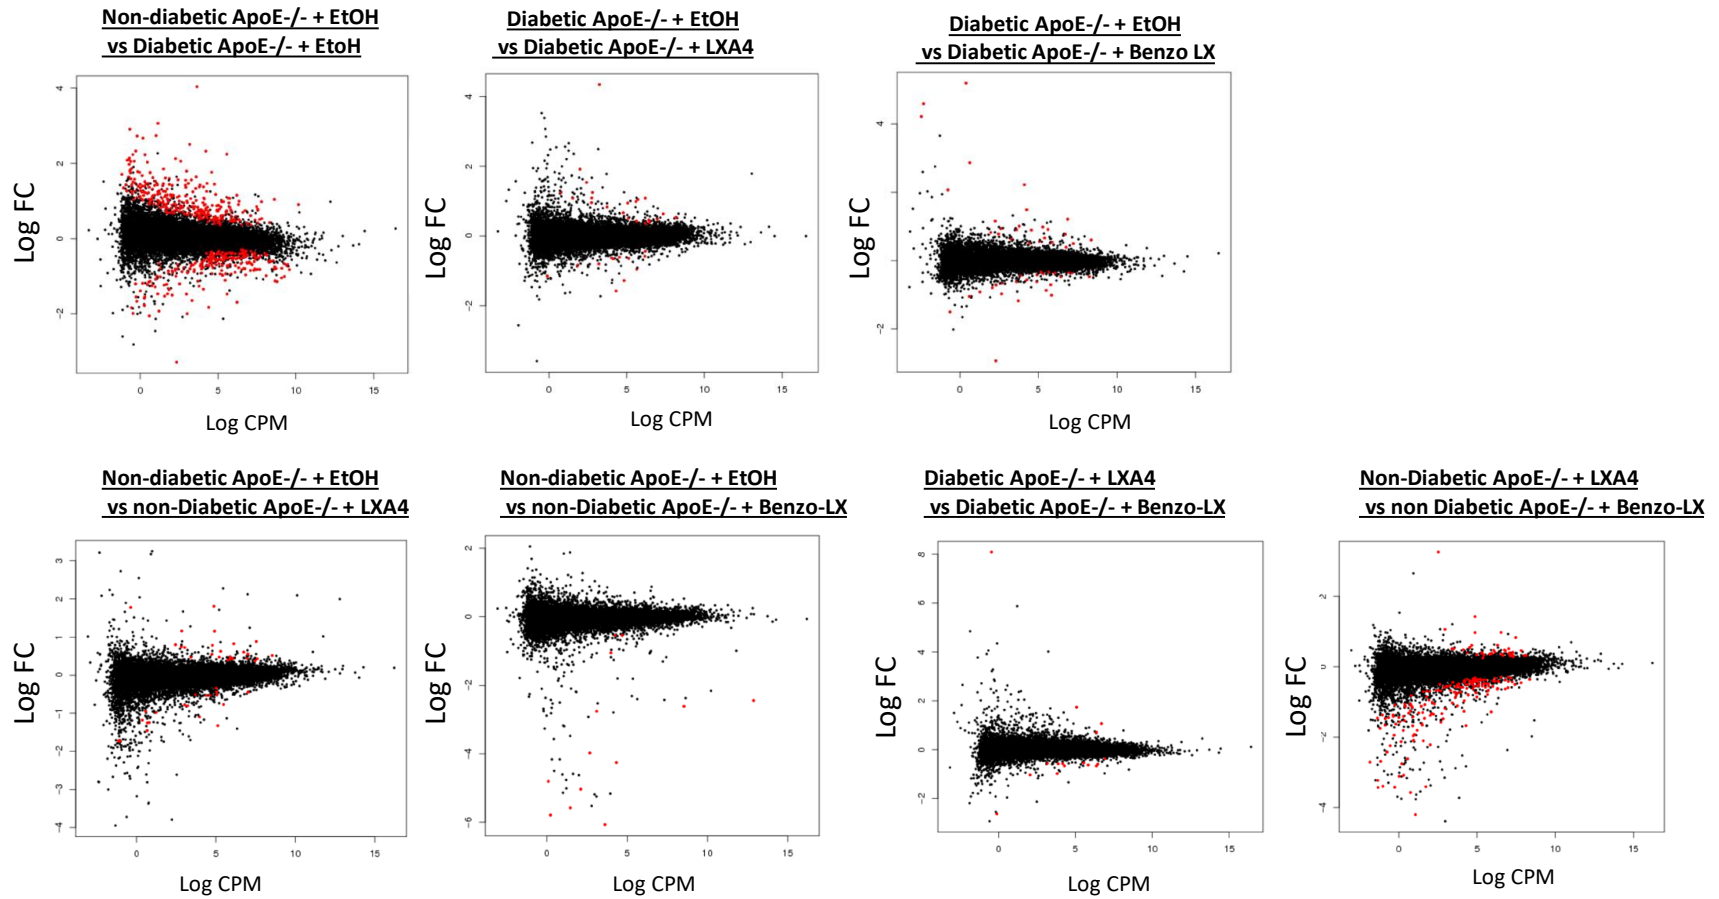

\*Each black point is a detected gene with non-significant changes in expression and red points are statistically significant (FDR<0.05). Log FC (Log<sub>2</sub> fold-change); Log CPM (Log<sub>2</sub> read-counts per million).

**Fig. S3. Compartment-specific expression of gene set differentially expressed in diabetic versus non-diabetic ApoE<sup>-/-</sup> kidneys.**

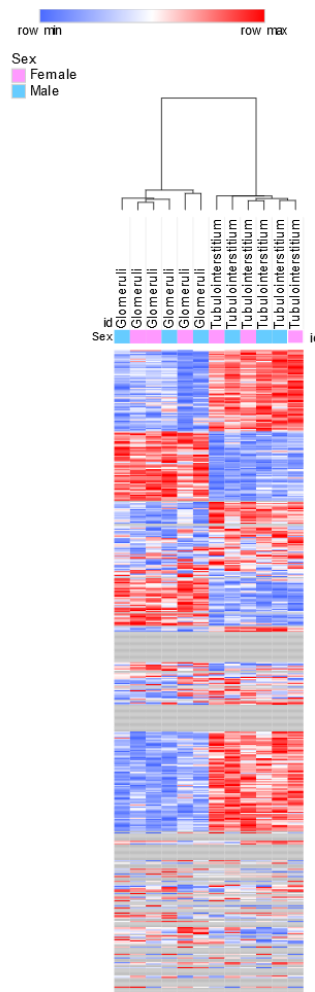

**Fig. S3. Compartment-specific expression of gene set differentially expressed in diabetic versus non-diabetic ApoE<sup>-/-</sup> kidneys.** Expression of 725 differentially expressed transcripts (identified in comparison of non-diabetic vs diabetic ApoE<sup>-/-</sup> mice) in micro-dissected healthy human kidneys (glomerular and tubule compartments). Human DKD microarray dataset was downloaded from Nephroseq (Lindenmeyer et al., PMID: 20634963). Red = higher expression; Blue = lower expression; Grey = no data available in human dataset for these genes.

**Fig. S4. Analysis of tubule compartment specific expression of gene set differentially expressed in diabetic versus non-diabetic ApoE<sup>-/-</sup> kidneys.**

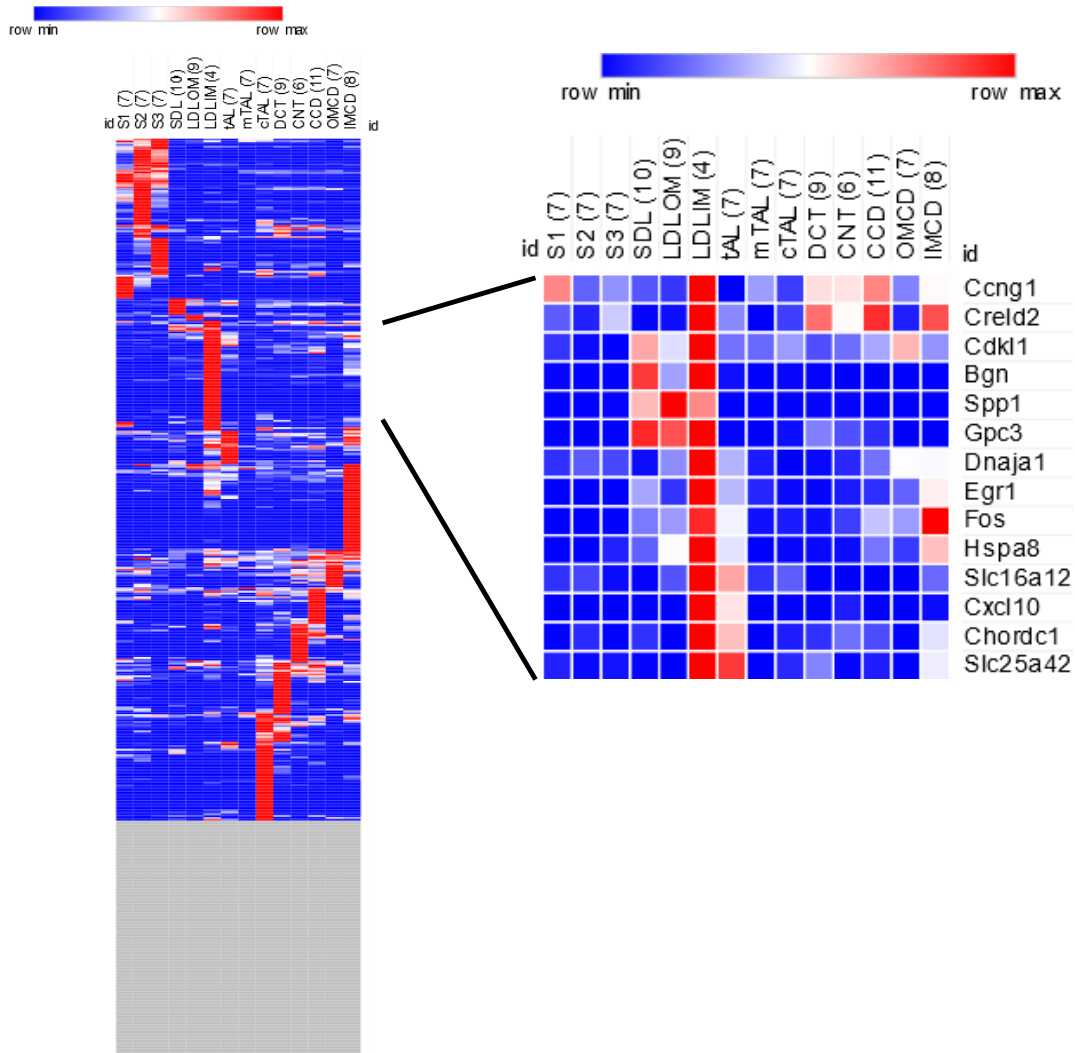

**Fig. S4. Analysis of tubule compartment specific expression of gene set differentially expressed in diabetic versus non-diabetic ApoE<sup>-/-</sup> kidneys.** Expression of 725 differentially expressed transcripts (identified in comparison of non-diabetic vs diabetic ApoE<sup>-/-</sup> mice) in 14 compartments of microdissected rat renal tubule. Rat renal tubule data was downloaded from (<https://hpcwebapps.cit.nih.gov/ESBL/Database/NephronRNAseq/index.html>) Lee JW et al., JASN 2015. PMID: 25817355. Red = higher expression; Blue = lower expression; Grey = no data available in rat tubule dataset for these genes. Terminology for nephron segments: S1, first segment of the proximal tubule; S2, second segment of the proximal tubule; S3, third segment of the proximal tubule; SDL, short descending limb of the loop of Henle; LDLOM, long descending limb of the loop of Henle in the outer medulla; LDLIM, long descending limb of the loop of Henle in the inner medulla; tAL, thin ascending limb of the loop of Henle; mTAL, medullary thick ascending limb of the loop of Henle; cTAL, cortical thick ascending limb of the loop of Henle; DCT, distal convoluted tubule; CNT, connecting tubule; CCD, cortical collecting duct; OMCD, outer medullary collecting duct; IMCD, inner medullary collecting duct.



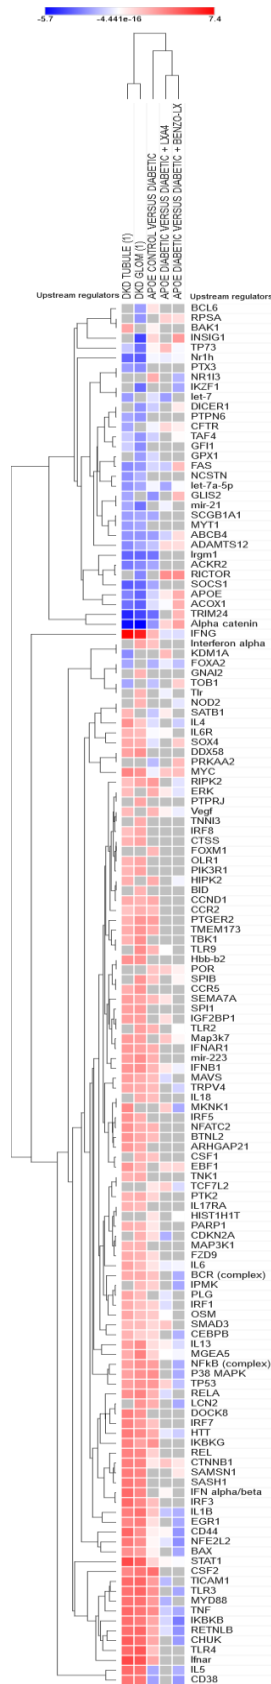

**Fig. S5. Comparison of transcriptional responses between human DKD and diabetic ApoE<sup>-/-</sup> model.** Human DKD microarray dataset was downloaded from Nephroseq (Ju et al., PMID: 26631632). Genes that were significantly differentially expressed (FDR p<0.05) in renal tissue between DKD patients and healthy controls were selected. Glomerular (n=979 genes at FDR p<0.05) and Tubule (n=1233 genes at FDR p<0.05) compartments were analysed separately. Analysis was performed on the human DKD gene sets, as well as the differential gene sets from the ApoE<sup>-/-</sup> model (control versus diabetic; diabetic versus diabetic + LXA<sub>4</sub>, diabetic versus Benzo-LXA<sub>4</sub>). Upstream regulator analysis was performed using Ingenuity Pathway Analysis software for interrogation of differentially expressed gene lists for putative upstream regulators that drive the differential expression. Z-score is the output. This is an activation score (red = activated; blue = repressed; grey = no evidence of this regulator being activated or repressed). A cut-off of >2 or <-2 was used to select the strongest regulators (as recommended by IPA) in human DKD datasets. These were then assessed in the ApoE model.



**Fig. S6. Expression of NF- $\kappa$ B target genes in ApoE<sup>-/-</sup> RNA-seq dataset.**

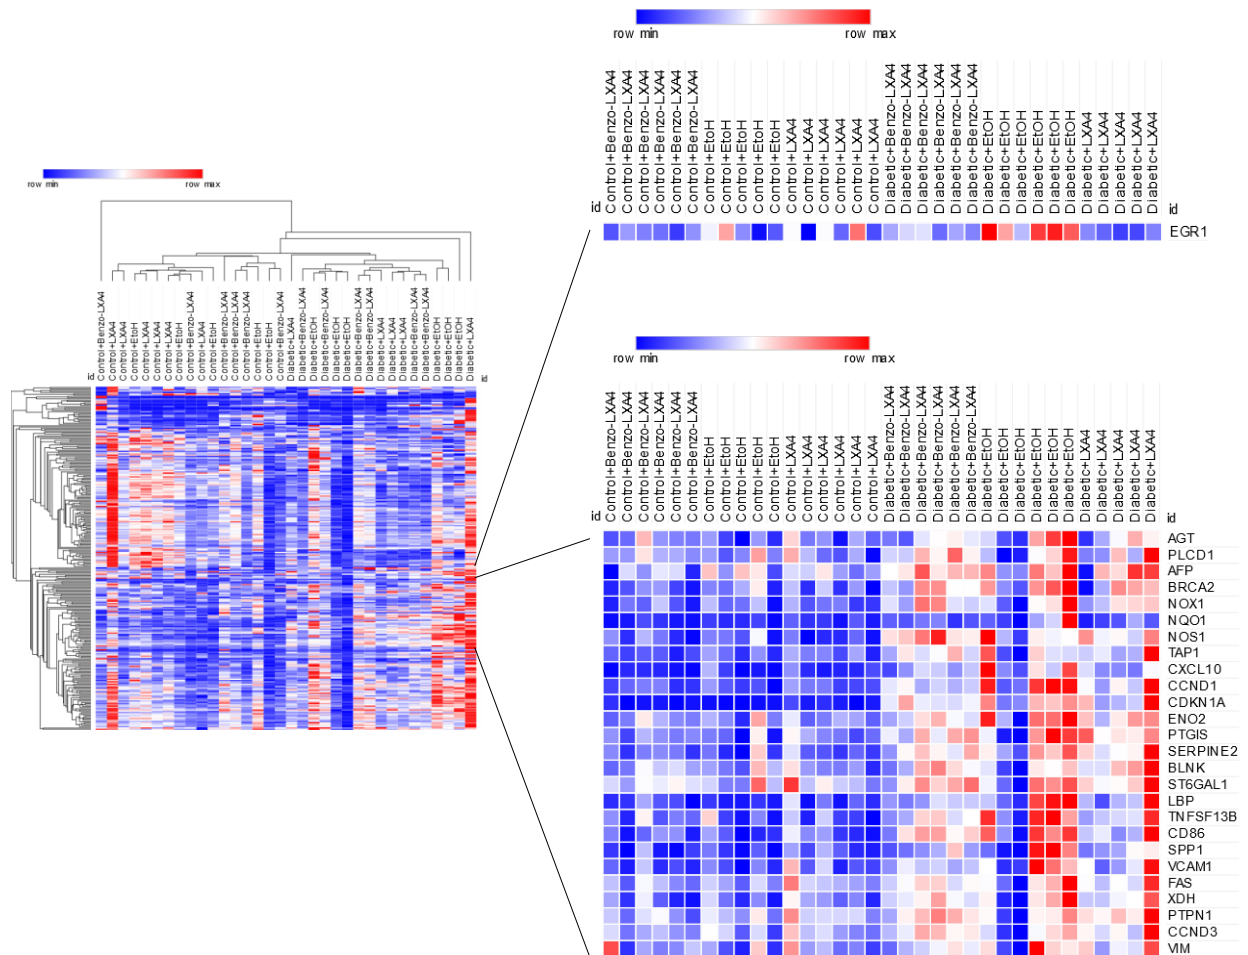

**Fig. S6. Expression of NF- $\kappa$ B target genes in ApoE<sup>-/-</sup> RNA-seq dataset.** NF- $\kappa$ B target gene database (<https://www.bu.edu/nf-kb/gene-resources/target-genes/>) was used for identification of target genes. The expression of 268 NF- $\kappa$ B targets expressed in ApoE<sup>-/-</sup> kidney RNA-seq data was then determined. Hierarchical clustering analysis indicates that there is clustering of non-diabetic and diabetic kidneys based on the expression of these genes. Red = higher expression; Blue = lower expression; Grey = no data available in ApoE<sup>-/-</sup> RNA-seq dataset for these genes.

**Fig. S7.** LXs regulate the EGR1 transcriptional network in DKD.

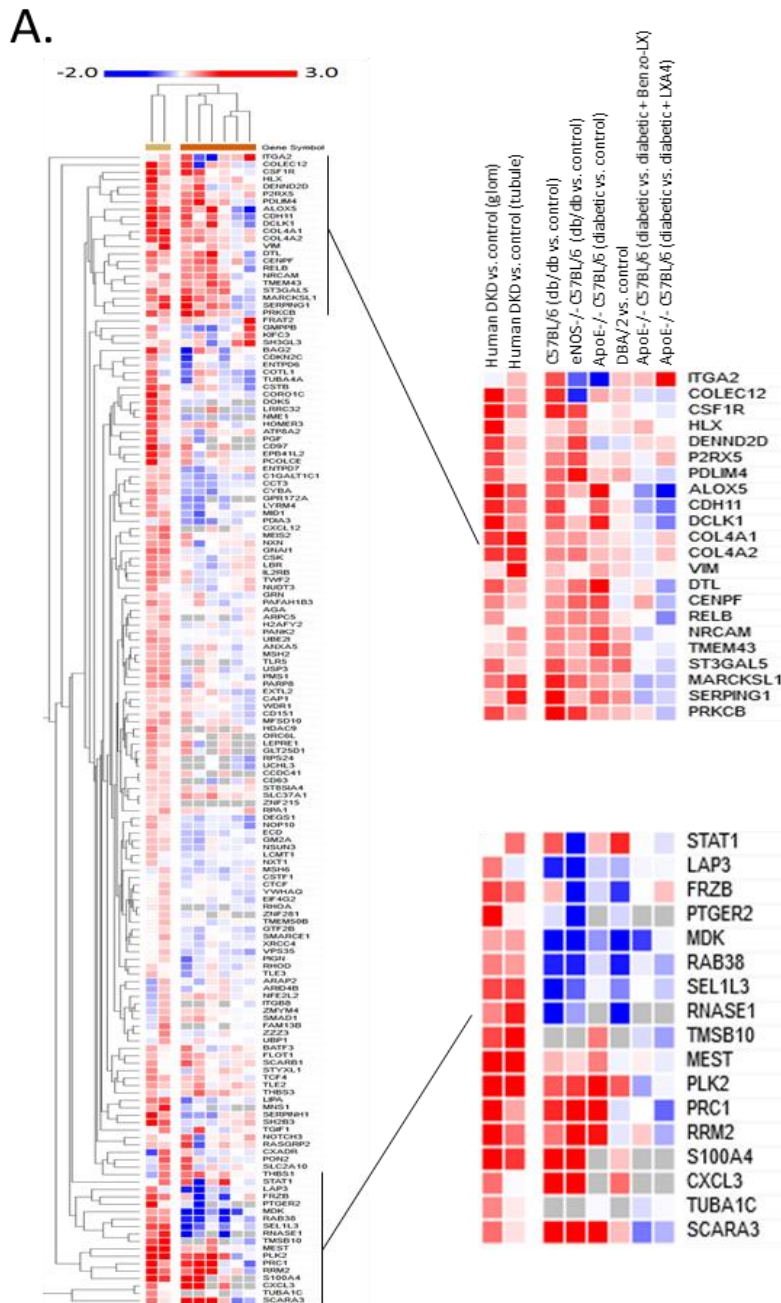

**Fig. S7.** Expression of EGR1 targets was determined in published transcriptomic data from patients with DKD versus healthy controls, and also in three diabetes mouse models. Transcriptomic datasets were downloaded from Nephroseq.<sup>10,11</sup> Predicted Egr1 target genes that were significantly differentially expressed (FDR  $p < 0.05$ ) in renal tissue between DKD patients and healthy controls were selected ( $n = 155$ ; FDR  $p < 0.05$ ). Heatmaps were generated of gene expression indicating transcripts displaying significant differential expression (FDR  $P$ -value  $< 0.05$ ). Red = upregulated; blue = downregulated; grey = no evidence of expression.

**Fig. S8. Analysis of tubule compartment specific expression of genes identified as expressed in HK-2 renal tubule epithelial cells.**

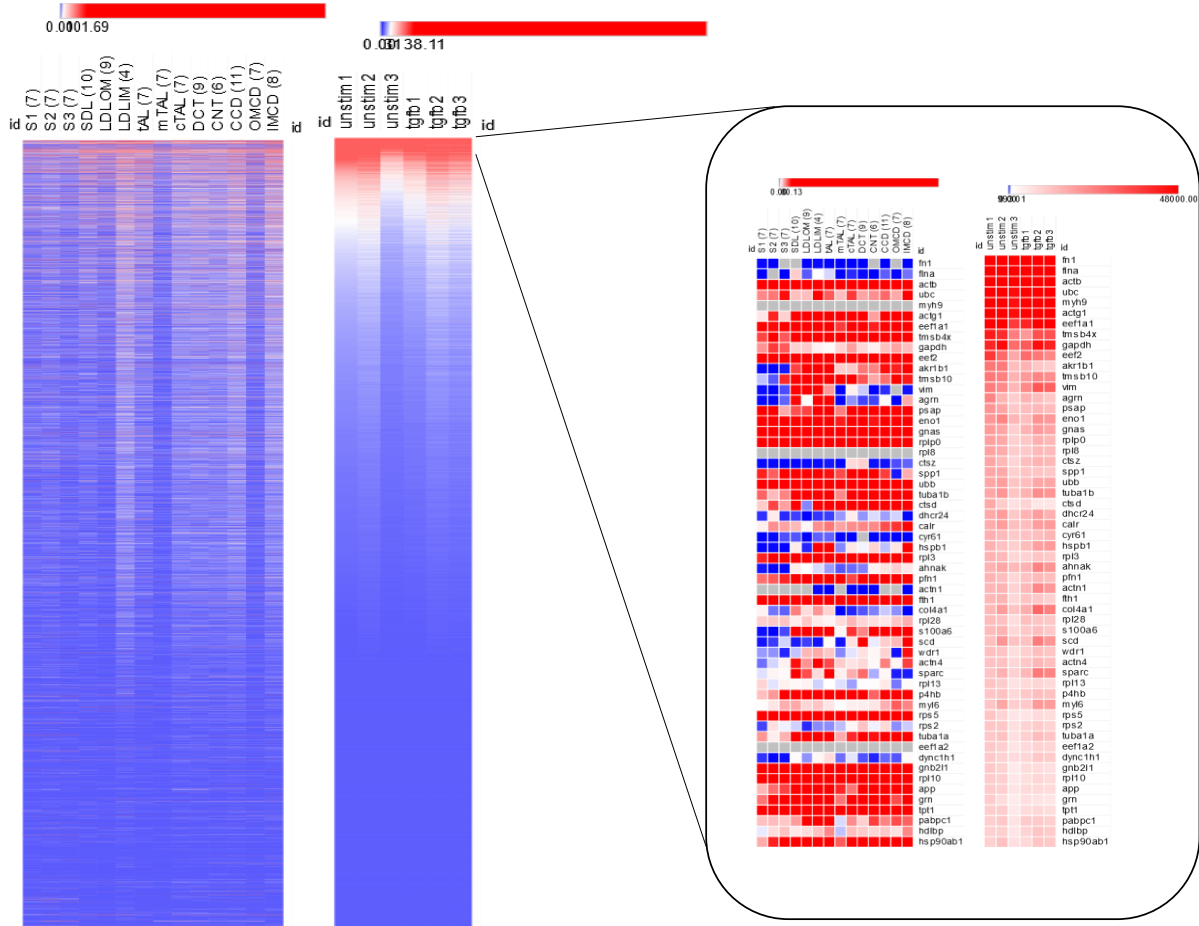

**Fig. S8. Analysis of tubule compartment specific expression of genes identified as expressed in HK-2 renal tubule epithelial cells.** We previously performed RNA-seq analysis of immortalized human proximal tubule epithelial cells (HK-2) (Brennan et al., PMID: 22266139). From these data, a total of 11,732 genes were robustly expressed in HK-2 cells. Here we investigated the tubule compartment-specific expression of these genes in 14 compartments of a micro-dissected rat renal tubule. Rat renal tubule data was downloaded from (<https://hpcwebapps.cit.nih.gov/ESBL/Database/NephronRNAseq/index.html>) Lee JW et al., JASN 2015. PMID: 25817355. Red = higher expression; Blue = lower expression. Terminology for nephron segments: S1, first segment of the proximal tubule; S2, second segment of the proximal tubule; S3, third segment of the proximal tubule; SDL, short descending limb of the loop of Henle; LDLOM, long descending limb of the loop of Henle in the outer medulla; LDLIM, long descending limb of the loop of Henle in the inner medulla; tAL, thin ascending limb of the loop of Henle; mTAL, medullary thick ascending limb of the loop of Henle; cTAL, cortical thick ascending limb of the loop of Henle; DCT, distal convoluted tubule; CNT, connecting tubule; CCD, cortical collecting duct; OMCD, outer medullary collecting duct; IMCD, inner medullary collecting duct.



**Table S1.** Differentially expressed genes between control and diabetic ApoE<sup>-/-</sup> mice.

| GENE ID           | Log2 Fold-change | FDR (CORRECTED P-VALUE) | GENE ID            | Log2 Fold-change | FDR (CORRECTED P-VALUE) |
|-------------------|------------------|-------------------------|--------------------|------------------|-------------------------|
| <b>Eda2r</b>      | 3.77             | 8.73E-65                | <b>Kif23</b>       | 0.85             | 0.009579192             |
| <b>Cdkn1a</b>     | 3.22             | 4.75E-54                | <b>Adamts14</b>    | 0.82             | 0.009676948             |
| <b>Trp53cor1</b>  | 3.25             | 1.63E-34                | <b>Serpine2</b>    | 0.73             | 0.009843774             |
| <b>Gm45011</b>    | 2.97             | 6.92E-30                | <b>Espnl</b>       | 0.77             | 0.010012367             |
| <b>Psrc1</b>      | 4.40             | 2.16E-26                | <b>Nat8</b>        | -0.71            | 0.010136542             |
| <b>Kcnip4</b>     | 2.55             | 1.16E-25                | <b>Lrrc32</b>      | 0.49             | 0.010142684             |
| <b>Dscaml1</b>    | 2.96             | 1.16E-25                | <b>Cd247</b>       | 0.84             | 0.010248419             |
|                   |                  |                         | <b>4933406I18R</b> |                  |                         |
| <b>Ano3</b>       | 4.11             | 1.97E-22                | <b>ik</b>          | 0.62             | 0.010332392             |
| <b>Mgmt</b>       | 1.15             | 5.35E-17                | <b>Hmgcr</b>       | -0.92            | 0.01036763              |
| <b>Fam212b</b>    | 2.75             | 2.16E-15                | <b>Tnnc1</b>       | -1.45            | 0.010553111             |
|                   |                  |                         | <b>4933427D06</b>  |                  |                         |
| <b>Zmat3</b>      | 0.94             | 4.23E-14                | <b>Rik</b>         | 1.48             | 0.010554075             |
| <b>Trpm8</b>      | 3.88             | 1.02E-13                | <b>Kcnip2</b>      | 1.09             | 0.010564754             |
| <b>Sulf2</b>      | 1.15             | 1.86E-13                | <b>Rhoq</b>        | 0.39             | 0.01060559              |
| <b>Plcd4</b>      | 1.46             | 5.28E-13                | <b>Gm16432</b>     | 0.59             | 0.010622298             |
| <b>Dpp6</b>       | 1.49             | 3.16E-12                | <b>Ctsk</b>        | 0.75             | 0.010797885             |
| <b>Gtse1</b>      | 2.11             | 1.70E-11                | <b>Fmo5</b>        | -0.66            | 0.010840349             |
| <b>Ugt1a10</b>    | 4.26             | 1.74E-11                | <b>Dtx4</b>        | 0.67             | 0.010987816             |
| <b>Trp53inp1</b>  | 1.07             | 4.03E-11                | <b>Cbr1</b>        | 1.20             | 0.011006467             |
| <b>Gm26542</b>    | 1.18             | 4.89E-11                | <b>Slc8a3</b>      | 1.26             | 0.011006467             |
| <b>Cldn1</b>      | 1.12             | 1.58E-10                | <b>Gm10830</b>     | 1.35             | 0.011066719             |
| <b>Plk2</b>       | 1.04             | 1.58E-10                | <b>Ttpa</b>        | 0.93             | 0.011309208             |
| <b>6030407O03</b> |                  |                         |                    |                  |                         |
| <b>Rik</b>        | 1.69             | 2.81E-10                | <b>Ube2e2</b>      | 0.42             | 0.011322178             |
| <b>4833428L15</b> |                  |                         |                    |                  |                         |
| <b>Rik</b>        | 3.98             | 1.02E-09                | <b>Blm</b>         | 0.73             | 0.011653609             |
| <b>Cyp2d12</b>    | -1.92            | 1.30E-09                | <b>Ccl6</b>        | 1.06             | 0.011746526             |
| <b>Tnfaip8</b>    | -1.12            | 1.92E-09                | <b>Psat1</b>       | -0.72            | 0.01181329              |
| <b>Tll2</b>       | 2.82             | 2.18E-09                | <b>Xbp1</b>        | -0.63            | 0.011909845             |
| <b>Alk</b>        | 1.34             | 2.87E-09                | <b>Polq</b>        | 0.84             | 0.012000339             |
| <b>D630023F18</b> |                  |                         |                    |                  |                         |
| <b>Rik</b>        | -1.74            | 3.37E-09                | <b>Plk3</b>        | 1.15             | 0.012060378             |
| <b>Kynu</b>       | 2.45             | 4.93E-09                | <b>Acta2</b>       | 0.75             | 0.012162165             |
| <b>Gdf15</b>      | 1.39             | 6.15E-09                | <b>Tox</b>         | 0.72             | 0.012443309             |
| <b>Ddias</b>      | 1.76             | 9.81E-09                | <b>Chrna4</b>      | -0.71            | 0.012443309             |
| <b>Gm13067</b>    | 1.52             | 1.58E-08                | <b>Vwc2</b>        | 2.24             | 0.012443309             |
| <b>Angptl7</b>    | -2.01            | 2.26E-08                | <b>Gm19418</b>     | 1.08             | 0.012583916             |
| <b>Nudt19</b>     | -1.11            | 3.72E-08                | <b>Nabp1</b>       | 0.48             | 0.012708693             |
| <b>Ccng1</b>      | 0.85             | 3.72E-08                | <b>Ces2b</b>       | -1.33            | 0.012710387             |
|                   |                  |                         | <b>RP23-</b>       |                  |                         |
| <b>Phlda3</b>     | 1.84             | 4.41E-08                | <b>403G9.6</b>     | -0.58            | 0.012866647             |

|                   |       |          |                   |       |             |
|-------------------|-------|----------|-------------------|-------|-------------|
| <b>Aldh1a7</b>    | 1.27  | 5.82E-08 | <b>Masp1</b>      | 1.42  | 0.012866647 |
| <b>Ppp1r1c</b>    | 3.03  | 5.82E-08 | <b>Iba57</b>      | -0.61 | 0.012908268 |
| <b>Gm10787</b>    | -1.61 | 9.37E-08 | <b>Egr1</b>       | 1.05  | 0.013002775 |
| <b>Gm10801</b>    | 2.84  | 1.44E-07 | <b>Pcdh9</b>      | 1.00  | 0.013088521 |
| <b>Ptprt</b>      | 2.02  | 1.44E-07 | <b>Art4</b>       | 0.72  | 0.013434097 |
| <b>Gpc3</b>       | 0.94  | 2.07E-07 | <b>Cyp2d9</b>     | -0.58 | 0.013721646 |
| <b>Aen</b>        | 0.82  | 3.29E-07 | <b>Csrp1</b>      | 0.47  | 0.013779774 |
| <b>Ccnd1</b>      | 1.05  | 3.30E-07 | <b>Mmp14</b>      | 0.64  | 0.013882712 |
| <b>Ngef</b>       | -0.62 | 3.87E-07 | <b>Dnajb1</b>     | -0.46 | 0.013962789 |
| <b>Npr3</b>       | -0.96 | 3.97E-07 | <b>Col24a1</b>    | 0.83  | 0.01405554  |
| <b>Gm6614</b>     | 2.69  | 6.07E-07 | <b>Hsp90aa1</b>   | -0.75 | 0.014088302 |
| <b>Gjb1</b>       | -0.79 | 6.95E-07 | <b>Isoc2b</b>     | -0.59 | 0.014412196 |
| <b>Fn1</b>        | 1.03  | 6.95E-07 | <b>Tagln</b>      | 0.71  | 0.014448187 |
| <b>Sntg1</b>      | 1.76  | 6.95E-07 | <b>Ttk</b>        | 1.34  | 0.014691235 |
| <b>1700024P16</b> |       |          |                   |       |             |
| <b>Rik</b>        | 1.77  | 7.69E-07 | <b>Gpc5</b>       | -1.10 | 0.015017502 |
| <b>Cpne4</b>      | -1.30 | 8.91E-07 | <b>Mrvi1</b>      | 0.40  | 0.015095492 |
| <b>Ces1d</b>      | -0.90 | 1.81E-06 | <b>Dclk3</b>      | -0.50 | 0.015189655 |
| <b>Gm12153</b>    | 1.29  | 1.86E-06 | <b>Klhl9</b>      | -0.42 | 0.015298851 |
| <b>Ltc4s</b>      | 1.32  | 2.55E-06 | <b>Hspe1</b>      | -0.67 | 0.015298851 |
| <b>Nat8f6</b>     | -1.01 | 3.14E-06 | <b>Ccnf</b>       | 0.99  | 0.015298851 |
| <b>Zak</b>        | 0.87  | 3.22E-06 | <b>Mctp2</b>      | 0.67  | 0.015576738 |
| <b>Mab2113</b>    | 1.21  | 3.22E-06 | <b>Gm4593</b>     | 0.86  | 0.015589538 |
| <b>Diaph3</b>     | 1.16  | 3.72E-06 | <b>Svop</b>       | 1.51  | 0.016125581 |
| <b>Gm9732</b>     | 2.66  | 4.61E-06 | <b>Abhd3</b>      | -0.55 | 0.016238576 |
| <b>Gm44202</b>    | 1.65  | 4.61E-06 | <b>Kif22</b>      | 1.28  | 0.016238576 |
| <b>Slc19a2</b>    | 0.70  | 6.58E-06 | <b>Gm13387</b>    | 0.83  | 0.016238576 |
| <b>Ppp2r2c</b>    | 1.83  | 6.99E-06 | <b>Rundc3a</b>    | 0.82  | 0.016238576 |
| <b>Tmem43</b>     | 0.79  | 7.00E-06 | <b>Chaf1b</b>     | 1.18  | 0.016304122 |
| <b>Aldh1a1</b>    | 1.69  | 7.66E-06 | <b>Gm12999</b>    | -1.25 | 0.01662482  |
| <b>Tnfrsf10b</b>  | 1.08  | 8.71E-06 | <b>Spag6l</b>     | 0.72  | 0.016674081 |
| <b>Cdh2</b>       | -0.77 | 9.52E-06 | <b>Mamld1</b>     | 0.80  | 0.0168547   |
| <b>A930001C03</b> |       |          |                   |       |             |
| <b>Rik</b>        | 0.87  | 1.09E-05 | <b>Atf3</b>       | 0.85  | 0.0168547   |
| <b>Gm37795</b>    | 1.37  | 1.09E-05 | <b>Rimkla</b>     | 0.88  | 0.0168547   |
|                   |       |          | <b>9130019P16</b> |       |             |
| <b>Grem1</b>      | 3.81  | 1.14E-05 | <b>Rik</b>        | 1.03  | 0.016879702 |
| <b>Gm29282</b>    | 1.76  | 1.18E-05 | <b>Tm4sf4</b>     | -1.29 | 0.016892269 |
| <b>Mki67</b>      | 1.30  | 1.19E-05 | <b>Gckr</b>       | 1.20  | 0.016973187 |
| <b>Clca3a1</b>    | 1.89  | 1.48E-05 | <b>Gm11837</b>    | -1.09 | 0.017027586 |
| <b>Olfr1442</b>   | 2.54  | 1.65E-05 | <b>Shh</b>        | -1.26 | 0.017027586 |
| <b>Ckap2</b>      | 1.84  | 1.67E-05 | <b>Asic2</b>      | 1.29  | 0.017050281 |
| <b>Ephx1</b>      | 1.20  | 1.70E-05 | <b>Wisp1</b>      | 0.68  | 0.017050281 |
| <b>Hsph1</b>      | -0.96 | 1.91E-05 | <b>Nepn</b>       | -0.86 | 0.017064629 |

|                   |       |             |                   |       |             |
|-------------------|-------|-------------|-------------------|-------|-------------|
| <b>Hspa1a</b>     | -1.41 | 2.06E-05    | <b>Gm15563</b>    | -2.01 | 0.017167265 |
| <b>Anln</b>       | 1.47  | 2.08E-05    | <b>Gpr135</b>     | 1.00  | 0.017167265 |
| <b>Akr1c13</b>    | 0.99  | 2.44E-05    | <b>Gm44626</b>    | -1.08 | 0.017167265 |
| <b>B3galt1</b>    | 0.82  | 2.57E-05    | <b>Tnfsf13b</b>   | 0.70  | 0.017272276 |
| <b>Zbtb40</b>     | -0.68 | 2.60E-05    | <b>Birc5</b>      | 1.25  | 0.017289706 |
| <b>P2ry1</b>      | -0.87 | 3.56E-05    | <b>Nlgn1</b>      | 0.89  | 0.017505002 |
| <b>G6pc</b>       | -1.13 | 4.31E-05    | <b>Ankrd34b</b>   | -1.49 | 0.017585986 |
| <b>Loxl4</b>      | 1.32  | 4.44E-05    | <b>Rell1</b>      | 0.45  | 0.017675365 |
| <b>Cxcl10</b>     | 1.49  | 4.59E-05    | <b>Ahcy</b>       | -0.48 | 0.017675365 |
| <b>9230114K14</b> |       |             |                   |       |             |
| <b>Rik</b>        | 0.57  | 4.80E-05    | <b>Gabrb3</b>     | -1.02 | 0.01771164  |
| <b>Cpe</b>        | -0.97 | 5.18E-05    | <b>Entpd1</b>     | 0.72  | 0.017859166 |
| <b>Ces2e</b>      | 0.80  | 5.32E-05    | <b>Dpysl3</b>     | 0.59  | 0.017975549 |
| <b>Snhg11</b>     | -0.61 | 5.51E-05    | <b>Gm16010</b>    | 1.26  | 0.017975549 |
| <b>Fbn1</b>       | 0.67  | 5.51E-05    | <b>Kcnmb2</b>     | 0.75  | 0.018197911 |
| <b>Esco2</b>      | 1.93  | 5.51E-05    | <b>G0s2</b>       | -0.66 | 0.018346224 |
| <b>Cpb2</b>       | 2.10  | 5.59E-05    | <b>L3mbtl4</b>    | 1.04  | 0.018474941 |
| <b>Lbp</b>        | 1.16  | 6.23E-05    | <b>Dnaja1</b>     | -0.56 | 0.018513498 |
| <b>Osr2</b>       | -1.20 | 6.58E-05    | <b>Arhgef38</b>   | 0.52  | 0.018712977 |
| <b>Sh3rf3</b>     | 1.45  | 7.56E-05    | <b>Aspdh</b>      | -0.87 | 0.01871427  |
| <b>Gm15441</b>    | -2.18 | 7.81E-05    | <b>Ldhd</b>       | -0.76 | 0.01871427  |
| <b>Mlip</b>       | 1.77  | 7.83E-05    | <b>Gm44829</b>    | 0.96  | 0.018722012 |
| <b>Vmn2r1</b>     | 1.97  | 7.83E-05    | <b>Gm15581</b>    | 0.84  | 0.018904148 |
| <b>Antxr1</b>     | 0.88  | 7.83E-05    | <b>Ces2c</b>      | -0.75 | 0.018944215 |
| <b>Stc1</b>       | 1.29  | 8.29E-05    | <b>Ccdc6</b>      | -0.48 | 0.019035014 |
| <b>Cyp2j8</b>     | 1.14  | 8.42E-05    | <b>Stra6l</b>     | 0.59  | 0.019125513 |
|                   |       |             | <b>2310014F06</b> |       |             |
| <b>Synpo2</b>     | 0.79  | 9.22E-05    | <b>Rik</b>        | 0.72  | 0.01915912  |
| <b>Gabra3</b>     | 0.78  | 9.22E-05    | <b>BC051142</b>   | 0.96  | 0.019163403 |
| <b>4833411C07</b> |       |             |                   |       |             |
| <b>Rik</b>        | -1.83 | 9.46E-05    | <b>Rarres2</b>    | 1.05  | 0.019167588 |
| <b>Car3</b>       | -1.97 | 9.66E-05    | <b>Adam22</b>     | 0.44  | 0.019549955 |
| <b>C3</b>         | 1.44  | 9.74E-05    | <b>Arhgef33</b>   | 0.81  | 0.019549955 |
| <b>Gucy1a3</b>    | 0.67  | 0.000103542 | <b>Hao2</b>       | 0.63  | 0.019564117 |
|                   |       |             | <b>2610027K06</b> |       |             |
| <b>Slc39a5</b>    | -1.05 | 0.000103542 | <b>Rik</b>        | -0.59 | 0.019564117 |
|                   |       |             | <b>A830018L16</b> |       |             |
| <b>Kcnab1</b>     | 1.40  | 0.000105161 | <b>Rik</b>        | 1.65  | 0.019564117 |
| <b>Arhgef4</b>    | 0.97  | 0.000107839 | <b>Fam195a</b>    | -0.59 | 0.019564117 |
| <b>Col14a1</b>    | 0.72  | 0.000109055 | <b>Tmem50a</b>    | -0.44 | 0.019564117 |
| <b>Kcnma1</b>     | 0.82  | 0.000109088 | <b>Slc6a15</b>    | -0.53 | 0.019564117 |
| <b>1700027A15</b> |       |             |                   |       |             |
| <b>Rik</b>        | 1.83  | 0.000123863 | <b>Il20rb</b>     | 0.82  | 0.019564117 |
| <b>C630028M0</b>  |       |             |                   |       |             |
| <b>4Rik</b>       | 2.33  | 0.00012486  | <b>Gja5</b>       | 0.73  | 0.019564117 |



|                   |       |             |                   |       |             |
|-------------------|-------|-------------|-------------------|-------|-------------|
| <b>Tcf24</b>      | -0.84 | 0.000134654 | <b>Gm906</b>      | -1.49 | 0.020080732 |
| <b>Cemip</b>      | 1.62  | 0.000156583 | <b>Gm8439</b>     | 1.64  | 0.020102085 |
| <b>Aldh1b1</b>    | 1.41  | 0.000174496 | <b>Slc22a27</b>   | 1.19  | 0.020235153 |
| <b>Snap91</b>     | 1.43  | 0.000174496 | <b>Ms4a6c</b>     | 0.79  | 0.020622041 |
| <b>Zwilch</b>     | 1.06  | 0.000178174 | <b>Mfap2</b>      | 1.13  | 0.020776688 |
| <b>Hspa1b</b>     | -1.49 | 0.000180276 | <b>Nsun7</b>      | 0.64  | 0.020926983 |
| <b>Brca1</b>      | 1.09  | 0.000184119 | <b>Cd84</b>       | 0.83  | 0.021183298 |
| <b>Iqgap3</b>     | 1.39  | 0.000185756 | <b>Kntc1</b>      | 0.98  | 0.021668322 |
| <b>Dlgap5</b>     | 1.46  | 0.000185756 | <b>Fat1</b>       | 0.42  | 0.02170867  |
| <b>Dll4</b>       | -0.91 | 0.000186624 | <b>Ace</b>        | -0.55 | 0.022130938 |
| <b>Adamts5</b>    | 0.60  | 0.000200843 | <b>Akr1d1</b>     | 0.51  | 0.022130938 |
| <b>Gm11100</b>    | 2.07  | 0.000204423 | <b>Rorc</b>       | -0.49 | 0.022216895 |
| <b>1600010M0</b>  |       |             |                   |       |             |
| <b>7Rik</b>       | -1.08 | 0.000221037 | <b>Vegfa</b>      | -0.43 | 0.02245845  |
| <b>Asb11</b>      | 1.49  | 0.000230907 | <b>Gabrr2</b>     | -0.92 | 0.02268808  |
| <b>Mis18bp1</b>   | 1.40  | 0.000230907 | <b>Angptl2</b>    | 0.43  | 0.022941247 |
| <b>Clspn</b>      | 1.49  | 0.000251601 | <b>Col12a1</b>    | 0.85  | 0.022941247 |
| <b>Tmem28</b>     | -1.06 | 0.000262189 | <b>Tnfp3</b>      | 1.02  | 0.023305612 |
| <b>Gm13412</b>    | -1.31 | 0.000262189 | <b>Tmem205</b>    | -0.51 | 0.023605316 |
| <b>Nusap1</b>     | 1.02  | 0.000265928 | <b>Sla</b>        | 0.73  | 0.023674524 |
| <b>Nefl</b>       | 1.94  | 0.000276385 | <b>Slc38a3</b>    | 0.88  | 0.023848864 |
| <b>Nkain1</b>     | -0.84 | 0.000284846 | <b>Zfp958</b>     | 0.41  | 0.02387842  |
| <b>Depdc1b</b>    | -0.58 | 0.000304407 | <b>Cyp51</b>      | -0.50 | 0.02387842  |
| <b>Arhgap11a</b>  | 1.12  | 0.000309154 | <b>Cyp4b1</b>     | -1.01 | 0.023911415 |
| <b>Ubiad1</b>     | -0.60 | 0.000311596 | <b>Apol9b</b>     | 1.10  | 0.023911415 |
| <b>Svep1</b>      | 0.51  | 0.000317005 | <b>Epha7</b>      | -0.85 | 0.02398354  |
|                   |       |             | <b>2810433D01</b> |       |             |
| <b>Fam198b</b>    | 0.78  | 0.000318875 | <b>Rik</b>        | 1.14  | 0.02398354  |
| <b>Cdk1</b>       | 1.30  | 0.000335156 | <b>Col8a1</b>     | -0.94 | 0.02398354  |
| <b>Olfr1443</b>   | 1.74  | 0.000344768 | <b>Rad54b</b>     | 1.00  | 0.02398354  |
| <b>Car4</b>       | -0.80 | 0.000345106 | <b>Nr4a1</b>      | 1.11  | 0.02398354  |
| <b>4732471J01</b> |       |             |                   |       |             |
| <b>Rik</b>        | -0.57 | 0.000348188 | <b>Npl</b>        | 0.82  | 0.024041142 |
|                   |       |             | <b>C030034L19</b> |       |             |
| <b>Ackr3</b>      | -0.77 | 0.000352541 | <b>Rik</b>        | 1.26  | 0.024041142 |
| <b>Samd5</b>      | 1.30  | 0.00035903  | <b>Shcbp1</b>     | 0.97  | 0.024041142 |
| <b>Nid1</b>       | 0.52  | 0.00035903  | <b>Crtam</b>      | 2.15  | 0.024041142 |
| <b>Fbln5</b>      | 0.58  | 0.000398897 | <b>Fcamr</b>      | -1.14 | 0.024041142 |
| <b>Nat8f1</b>     | -0.93 | 0.000399305 | <b>Acy3</b>       | -0.94 | 0.024041142 |
| <b>Esm1</b>       | -1.21 | 0.000450988 | <b>Dhrs4</b>      | -0.59 | 0.024181005 |
| <b>Nebi</b>       | 0.62  | 0.000464149 | <b>Plekhb1</b>    | -0.55 | 0.024653927 |
| <b>Gas2l3</b>     | 1.01  | 0.000464149 | <b>Cmya5</b>      | 0.61  | 0.024653927 |
| <b>Paqr7</b>      | -0.97 | 0.000470847 | <b>C3ar1</b>      | 0.79  | 0.024698889 |
| <b>Pole</b>       | 1.18  | 0.000475154 | <b>D2hgdh</b>     | -0.42 | 0.024698889 |

|                   |       |             |                   |       |             |
|-------------------|-------|-------------|-------------------|-------|-------------|
| <b>Tex15</b>      | 1.33  | 0.000477106 | <b>Trpv6</b>      | 0.91  | 0.024903267 |
| <b>Cfap44</b>     | 1.16  | 0.000492976 | <b>Tet2</b>       | 0.45  | 0.024903267 |
| <b>Apoh</b>       | -1.30 | 0.000492976 | <b>Ccl5</b>       | 1.13  | 0.024903267 |
| <b>Gsta2</b>      | 1.01  | 0.000492976 | <b>Gmpr</b>       | -0.41 | 0.024950708 |
| <b>E230016K23</b> |       |             |                   |       |             |
| <b>Rik</b>        | 1.05  | 0.000527561 | <b>Rad51b</b>     | 0.72  | 0.025158381 |
| <b>Sdk1</b>       | 0.76  | 0.000543535 | <b>Stra6</b>      | 1.25  | 0.02525358  |
| <b>Mmp2</b>       | 1.29  | 0.000557573 | <b>Gm3294</b>     | 1.29  | 0.02536072  |
| <b>Mgp</b>        | 0.89  | 0.000572491 | <b>Kcng3</b>      | 1.28  | 0.025624924 |
| <b>Tspan2</b>     | 0.87  | 0.000572491 | <b>Gm44127</b>    | 2.30  | 0.025750159 |
| <b>Mpped1</b>     | 1.34  | 0.00058469  | <b>Exoc4</b>      | 0.49  | 0.025968133 |
| <b>Coq10b</b>     | -0.54 | 0.000594251 | <b>Gm15983</b>    | 0.76  | 0.026369828 |
| <b>Slc25a42</b>   | -0.66 | 0.000624609 | <b>Cd4</b>        | 0.97  | 0.026395722 |
| <b>L3mbtl1</b>    | 1.58  | 0.000643541 | <b>Pappa</b>      | 0.71  | 0.026404126 |
| <b>Cox6a2</b>     | -2.00 | 0.000644584 | <b>Aspg</b>       | -0.78 | 0.026698243 |
| <b>Bgn</b>        | 0.60  | 0.000699478 | <b>Manf</b>       | -0.75 | 0.027002345 |
| <b>Neat1</b>      | 0.98  | 0.000701642 | <b>Kif1a</b>      | 1.16  | 0.027160412 |
| <b>Neil3</b>      | 1.56  | 0.000723987 | <b>Calb1</b>      | 0.52  | 0.027160412 |
| <b>Stc2</b>       | 1.01  | 0.000857293 | <b>Hivep3</b>     | 0.46  | 0.027160412 |
| <b>Uhrf1</b>      | 1.19  | 0.000858778 | <b>Fkbp4</b>      | -0.63 | 0.027160412 |
| <b>Pigz</b>       | 1.43  | 0.000877231 | <b>Lama2</b>      | 0.47  | 0.027160412 |
| <b>Mdm2</b>       | 0.47  | 0.00099063  | <b>Sobp</b>       | 0.71  | 0.02729716  |
|                   |       |             | <b>4930578G10</b> |       |             |
| <b>Gm5717</b>     | 1.02  | 0.00099063  | <b>Rik</b>        | 1.50  | 0.027913396 |
| <b>Poln</b>       | 1.53  | 0.00099063  | <b>Gm43016</b>    | 1.09  | 0.027913396 |
| <b>A930033H14</b> |       |             |                   |       |             |
| <b>Rik</b>        | -0.88 | 0.00099063  | <b>Slc7a12</b>    | 1.85  | 0.02803113  |
| <b>Casc5</b>      | 1.10  | 0.00099063  | <b>Lgals3bp</b>   | 0.72  | 0.028090663 |
| <b>Akr1c20</b>    | 1.91  | 0.000999734 | <b>Gm13111</b>    | -0.61 | 0.028090663 |
| <b>Gpnmb</b>      | 2.50  | 0.00100703  | <b>Kcnab2</b>     | -0.64 | 0.028326102 |
| <b>F2r</b>        | 0.74  | 0.001033634 | <b>Slc16a14</b>   | -0.92 | 0.028326102 |
| <b>Vcam1</b>      | 0.79  | 0.001033634 | <b>Parpbp</b>     | 0.88  | 0.028326102 |
| <b>Adamtsl3</b>   | 1.01  | 0.001123391 | <b>Kcnt2</b>      | 0.57  | 0.028568858 |
| <b>Gm3448</b>     | 0.94  | 0.001123391 | <b>Pir</b>        | 0.70  | 0.028790527 |
| <b>Tmtc4</b>      | -0.71 | 0.001147034 | <b>Rab31</b>      | 0.54  | 0.028964715 |
| <b>Tmem132b</b>   | 1.79  | 0.001147034 | <b>Prima1</b>     | -0.67 | 0.028969828 |
| <b>Sparcl1</b>    | 0.87  | 0.001164123 | <b>Gm16505</b>    | -1.33 | 0.028969828 |
| <b>A330033J07</b> |       |             |                   |       |             |
| <b>Rik</b>        | 1.41  | 0.001192759 | <b>Smim22</b>     | -1.00 | 0.029457905 |
| <b>Ms4a7</b>      | 0.91  | 0.001214604 | <b>Slc13a3</b>    | -0.59 | 0.029805665 |
| <b>Slc16a10</b>   | -0.66 | 0.001361023 | <b>Fcgr2b</b>     | -0.54 | 0.029805665 |
| <b>Hmcn1</b>      | 0.68  | 0.001393465 | <b>Lonrf1</b>     | -0.71 | 0.02990429  |
| <b>Trpm3</b>      | 0.85  | 0.001393465 | <b>Slc34a3</b>    | -0.84 | 0.02990429  |
| <b>Melk</b>       | 1.31  | 0.001393465 | <b>Birc3</b>      | 0.48  | 0.03003825  |

|            |       |             |               |       |             |
|------------|-------|-------------|---------------|-------|-------------|
| Dgkb       | -0.61 | 0.001393465 | Sap30         | -0.73 | 0.03003825  |
| Exo1       | 1.69  | 0.001398249 | Hpgds         | 0.80  | 0.03014368  |
| Cp         | 1.09  | 0.001400168 | Fads2         | -0.42 | 0.030150818 |
| Ftcd       | 0.74  | 0.001413579 | Nrap          | 0.85  | 0.030151069 |
| Pappa2     | -1.96 | 0.001438359 | Gm38048       | 1.02  | 0.030271805 |
| Il33       | 0.83  | 0.001469406 | Card14        | 0.65  | 0.030271805 |
| Smad7      | -0.64 | 0.001500351 | Plxna2        | 0.39  | 0.030271805 |
| Grm8       | 1.30  | 0.001509827 | Aldh3b3       | -0.95 | 0.030271805 |
| Abca1      | 0.66  | 0.001561889 | Aadat         | -0.54 | 0.030311443 |
| Prc1       | 1.03  | 0.001567868 | Lockd         | 0.84  | 0.030311443 |
| Slitrk4    | 2.61  | 0.001567868 | Slc17a1       | -0.52 | 0.030311443 |
| Gm1604b    | 0.91  | 0.001620691 | Fos           | 1.28  | 0.030311443 |
| Ahsa2      | -0.65 | 0.001635698 | Srgap1        | 0.43  | 0.030486144 |
| Gm34240    | 1.59  | 0.001635698 | Serping1      | 0.63  | 0.030977724 |
| Mt1        | 1.11  | 0.001644429 | Gm44174       | 1.06  | 0.030990933 |
| Ccdc18     | 1.16  | 0.00167064  | Ahsa1         | -0.52 | 0.030990933 |
| Cacna1e    | 0.88  | 0.00169607  | RP24-420C18.2 | -1.50 | 0.030990933 |
| Rasa3      | 0.55  | 0.001711702 | Ces1f         | -0.72 | 0.030990933 |
| Spock1     | 1.96  | 0.00177848  | Gm10271       | -0.74 | 0.03159661  |
| Stil       | 1.19  | 0.00177848  | Gda           | -0.45 | 0.03159661  |
| Pcdh11x    | -1.49 | 0.001804795 | Lyz2          | 0.69  | 0.03159661  |
| Rrm2       | 0.94  | 0.001823116 | Zfp385a       | 0.59  | 0.03172998  |
| Kif4       | 1.08  | 0.001837703 | Wdr27         | 0.67  | 0.032079904 |
| Zfp423     | 0.68  | 0.001842448 | Fbn2          | 1.22  | 0.032205903 |
| Acaa1b     | -0.76 | 0.001848029 | Irf7          | 0.70  | 0.032685999 |
| Cd86       | 0.82  | 0.001899982 | Ggct          | -0.60 | 0.03292138  |
| Lin7a      | -0.67 | 0.002016067 | Plch1         | 0.56  | 0.033011608 |
| C1qtnf3    | -0.88 | 0.002016067 | Tmem237       | -0.64 | 0.033022533 |
| Ttr        | -1.04 | 0.002023144 | Gm10388       | 1.37  | 0.033022533 |
| A2m        | -2.15 | 0.002043764 | Cmtm6         | -0.65 | 0.033022533 |
| Pate2      | 1.17  | 0.002051858 | Platr25       | 0.80  | 0.033057218 |
| Themis     | 1.04  | 0.002080101 | Stk35         | -0.41 | 0.033242429 |
| 2810407A14 |       |             |               |       |             |
| Rik        | 1.12  | 0.002177895 | Slc16a12      | -0.44 | 0.033250425 |
| St18       | 1.55  | 0.002210048 | Ncapg         | 1.11  | 0.033553422 |
| 4932411K12 |       |             |               |       |             |
| Rik        | 1.21  | 0.002374687 | Rasl10b       | 1.15  | 0.033553422 |
| Tpx2       | 0.99  | 0.002381173 | Hspa8         | -0.65 | 0.033553422 |
| Hsd17b2    | -0.64 | 0.002532463 | Amacr         | -0.84 | 0.033553422 |
| Odc1       | -1.17 | 0.002532463 | Fam129a       | 0.55  | 0.033646919 |
| Scg5       | 0.94  | 0.002599677 | 8430419K02    |       |             |
| Bdkrb2     | 1.20  | 0.002599677 | Rik           | 1.35  | 0.033646919 |
|            |       |             | Aspm          | 0.77  | 0.033646919 |

|                   |       |             |                   |       |             |
|-------------------|-------|-------------|-------------------|-------|-------------|
| <b>Crb1</b>       | -1.32 | 0.002627013 | <b>Acad10</b>     | -0.41 | 0.033646919 |
| <b>Gm43948</b>    | 1.79  | 0.002654872 | <b>Mettl7b</b>    | -0.54 | 0.033646919 |
| <b>Dtl</b>        | 1.26  | 0.002654872 | <b>Echdc2</b>     | -0.55 | 0.033983605 |
| <b>Xlr3a</b>      | -1.77 | 0.002654872 | <b>Alox5</b>      | 1.11  | 0.034123737 |
| <b>Pros1</b>      | 0.58  | 0.00267056  | <b>Ebp</b>        | -0.40 | 0.034251399 |
| <b>Atp2b4</b>     | 0.50  | 0.002729759 | <b>Rbm3</b>       | 0.45  | 0.034558151 |
| <b>Myl9</b>       | 0.58  | 0.002790733 | <b>Amdhd1</b>     | 1.05  | 0.034660217 |
| <b>Stip1</b>      | -0.62 | 0.002971899 | <b>Bard1</b>      | 0.61  | 0.034781805 |
| <b>Zdhhc19</b>    | 1.75  | 0.002974115 | <b>Gm28802</b>    | 1.42  | 0.034781805 |
| <b>Rbm11</b>      | 1.23  | 0.003081189 | <b>S100a10</b>    | 0.43  | 0.034911821 |
| <b>Dcn</b>        | 0.84  | 0.003081189 | <b>Fasn</b>       | -0.48 | 0.034973702 |
| <b>Dnaja4</b>     | -0.54 | 0.003092947 | <b>Sdf2l1</b>     | -0.89 | 0.035105961 |
| <b>Agt</b>        | 0.81  | 0.003096125 | <b>Kif11</b>      | 0.83  | 0.035207811 |
| <b>Miox</b>       | -0.83 | 0.003105081 | <b>Josd2</b>      | -0.81 | 0.03540355  |
|                   |       |             | <b>A330093E20</b> |       |             |
| <b>C1s1</b>       | 0.69  | 0.003114916 | <b>Rik</b>        | 1.26  | 0.03540355  |
| <b>F5</b>         | -1.49 | 0.003123712 | <b>Hao</b>        | -0.56 | 0.035406525 |
| <b>Gabbr2</b>     | 1.04  | 0.003204399 | <b>Hspa4l</b>     | -0.41 | 0.035447112 |
| <b>Cyp1b1</b>     | 0.74  | 0.00322941  | <b>Garnl3</b>     | 0.83  | 0.035730371 |
| <b>Nqo1</b>       | 1.12  | 0.003235666 | <b>Hells</b>      | 0.62  | 0.036051544 |
| <b>Abca14</b>     | 1.08  | 0.00325968  | <b>Zfp706</b>     | -0.38 | 0.036147321 |
| <b>Dscam</b>      | 1.76  | 0.003318636 | <b>Pcyt2</b>      | -0.37 | 0.036323018 |
| <b>Nrg1</b>       | 0.61  | 0.00336306  | <b>Kif18b</b>     | 1.25  | 0.036324642 |
| <b>Runx2</b>      | 0.60  | 0.003416652 | <b>Mgat3</b>      | -0.44 | 0.036490376 |
| <b>Rxrg</b>       | 1.54  | 0.003452638 | <b>Thsd1</b>      | 0.56  | 0.036490376 |
| <b>Cdh11</b>      | 0.62  | 0.003481264 | <b>Cpox</b>       | -0.51 | 0.036653391 |
| <b>Ncapg2</b>     | 0.75  | 0.003568569 | <b>Dnajb2</b>     | -0.42 | 0.036760048 |
| <b>Gm11766</b>    | -1.27 | 0.003568569 | <b>Fanci</b>      | 0.94  | 0.036847148 |
| <b>Ugt2b5</b>     | 1.06  | 0.003568569 | <b>Gm14232</b>    | 1.05  | 0.036847148 |
| <b>4930533I22</b> |       |             |                   |       |             |
| <b>Rik</b>        | -0.67 | 0.003573506 | <b>Cpt2</b>       | -0.41 | 0.036847148 |
| <b>Ighg2b</b>     | 1.78  | 0.00372872  | <b>Prune2</b>     | 1.22  | 0.037013926 |
| <b>Slc9a8</b>     | -0.61 | 0.003778066 | <b>Ezh2</b>       | 0.43  | 0.037180113 |
| <b>Golm1</b>      | 0.89  | 0.003792713 | <b>Wfdc15b</b>    | -0.77 | 0.037212028 |
| <b>Pth2r</b>      | 1.11  | 0.003820403 | <b>Hist1h3c</b>   | 1.08  | 0.037212028 |
| <b>Polk</b>       | 0.44  | 0.003860633 | <b>Capsl</b>      | 1.17  | 0.037212028 |
| <b>Arnt2</b>      | 0.53  | 0.003879127 | <b>Cbr3</b>       | 1.31  | 0.037212028 |
| <b>Ank1</b>       | 1.00  | 0.00395734  | <b>Grb7</b>       | -0.48 | 0.037401673 |
| <b>Slc41a3</b>    | 0.67  | 0.00395734  | <b>Zbed3</b>      | -0.43 | 0.037401673 |
| <b>Gm45051</b>    | -1.40 | 0.004038009 | <b>Ctss</b>       | 0.49  | 0.037401673 |
| <b>Egfem1</b>     | 0.83  | 0.004038009 | <b>Galnt11</b>    | -0.47 | 0.037665631 |
| <b>Naip1</b>      | 1.87  | 0.004043629 | <b>Hhat</b>       | 0.40  | 0.037741723 |
| <b>Nap1l5</b>     | -1.14 | 0.004043629 | <b>Pde10a</b>     | 0.65  | 0.038099067 |

|                   |       |             |                   |       |             |
|-------------------|-------|-------------|-------------------|-------|-------------|
| <b>Palm3</b>      | 0.71  | 0.004065742 | <b>Gm14963</b>    | -0.76 | 0.038138357 |
| <b>Col27a1</b>    | -0.94 | 0.004080484 | <b>Iqcc</b>       | -0.54 | 0.038138357 |
| <b>Fetub</b>      | 1.11  | 0.004080484 | <b>Gpr173</b>     | 0.85  | 0.038138357 |
| <b>Mcm5</b>       | 0.82  | 0.004121968 | <b>Cbs</b>        | -0.40 | 0.038170561 |
| <b>Kif15</b>      | 1.11  | 0.004173332 | <b>Msh4</b>       | 0.91  | 0.038170561 |
| <b>Spp1</b>       | 0.99  | 0.004231284 | <b>Etv1</b>       | -0.97 | 0.038189078 |
| <b>Ung</b>        | 1.32  | 0.004237784 | <b>Cpt1c</b>      | 0.83  | 0.038387017 |
| <b>Efcab11</b>    | 0.86  | 0.004315425 | <b>Kcnh7</b>      | -1.91 | 0.03840228  |
| <b>Epha6</b>      | 0.95  | 0.004394363 | <b>St8sia6</b>    | -0.37 | 0.038415909 |
| <b>Mttp</b>       | -0.61 | 0.004460026 | <b>9130409J20</b> |       |             |
| <b>Gm26672</b>    | -1.23 | 0.004662414 | <b>Rik</b>        | -3.12 | 0.038456009 |
| <b>Wdhd1</b>      | 0.75  | 0.004765688 | <b>9930014A18</b> |       |             |
| <b>Inmt</b>       | -1.19 | 0.004879528 | <b>Rik</b>        | 0.67  | 0.038456009 |
| <b>Dpf3</b>       | -0.48 | 0.004906669 | <b>Chaf1a</b>     | 0.64  | 0.038703022 |
| <b>Gm7205</b>     | 0.94  | 0.00515389  | <b>1500017E21</b> |       |             |
| <b>Extl1</b>      | 1.27  | 0.00515389  | <b>Rik</b>        | 1.29  | 0.038715575 |
| <b>Rgs5</b>       | 0.61  | 0.00515389  | <b>Lif</b>        | 0.96  | 0.039174148 |
| <b>Slitrk6</b>    | -0.97 | 0.00517332  | <b>Gm42636</b>    | 1.11  | 0.039396669 |
| <b>Chordc1</b>    | -0.48 | 0.005227557 | <b>Tchhl1</b>     | 0.95  | 0.039560702 |
| <b>Efcab8</b>     | 1.41  | 0.005244149 | <b>Chrdl2</b>     | 1.73  | 0.039560702 |
| <b>Ccdc148</b>    | 0.49  | 0.005334889 | <b>Creld2</b>     | -0.76 | 0.039560702 |
| <b>Pde6h</b>      | 0.80  | 0.005373115 | <b>Slc25a25</b>   | -0.66 | 0.040067622 |
| <b>A430093F15</b> |       |             | <b>Gm13660</b>    | 1.09  | 0.040067622 |
| <b>Rik</b>        | 1.41  | 0.005591928 | <b>Zfp462</b>     | 0.35  | 0.040078084 |
| <b>Epha3</b>      | 0.84  | 0.005637197 | <b>Cyp2j11</b>    | -0.37 | 0.040078084 |
| <b>Akr1c12</b>    | 0.87  | 0.005637329 | <b>C7</b>         | 1.07  | 0.040155285 |
| <b>Bhmt</b>       | 1.11  | 0.005654491 | <b>Gbp8</b>       | 0.68  | 0.040222844 |
| <b>6030443J06</b> |       |             | <b>P2rx7</b>      | 0.66  | 0.041585874 |
| <b>Rik</b>        | 0.51  | 0.005659182 | <b>Pi15</b>       | 0.61  | 0.041868071 |
| <b>Vegfd</b>      | 0.65  | 0.005659182 | <b>Sparc</b>      | 0.45  | 0.04230449  |
| <b>RP24-</b>      |       |             | <b>Hsp90ab1</b>   | -0.62 | 0.042446532 |
| <b>335D17.3</b>   | -1.29 | 0.005673471 | <b>Hfe</b>        | 0.47  | 0.042446532 |
| <b>Serpinf2</b>   | -0.82 | 0.005732809 | <b>Cbfa2t3</b>    | -0.45 | 0.043113383 |
| <b>Slc22a3</b>    | 1.29  | 0.005732809 | <b>Brca2</b>      | 0.55  | 0.043176121 |
| <b>Abcb1a</b>     | 0.87  | 0.005732809 | <b>Slc7a13</b>    | -0.72 | 0.043479187 |
| <b>Ndnf</b>       | 1.81  | 0.005736337 | <b>Hmmr</b>       | 0.98  | 0.043547863 |
| <b>Cby3</b>       | 1.81  | 0.005828929 | <b>Zbtb7a</b>     | -0.43 | 0.043547863 |
| <b>Lpo</b>        | 1.89  | 0.005937133 | <b>Zgrf1</b>      | 0.63  | 0.043547863 |
| <b>Aldh1a2</b>    | 0.94  | 0.006062034 | <b>Ddit4</b>      | 1.18  | 0.043547863 |
| <b>Mt2</b>        | 1.24  | 0.006237894 | <b>Pabpc1l</b>    | 1.69  | 0.043671738 |
| <b>Clic6</b>      | 1.98  | 0.006250089 | <b>Slc5a10</b>    | 0.42  | 0.043778655 |
| <b>Fancd2</b>     | 1.00  | 0.00630813  | <b>Lad1</b>       | -0.33 | 0.043888974 |

|                   |       |             |                  |       |             |
|-------------------|-------|-------------|------------------|-------|-------------|
| <b>Mpeg1</b>      | 0.62  | 0.006459064 | <b>Gm17597</b>   | -1.04 | 0.043955773 |
| <b>Veph1</b>      | -0.50 | 0.006755023 | <b>Nxpe4</b>     | 0.63  | 0.04410416  |
| <b>Papln</b>      | 0.77  | 0.006840456 | <b>Gucy1a2</b>   | 0.39  | 0.04410416  |
| <b>Prdm1</b>      | -0.82 | 0.006840456 | <b>Acss2</b>     | -0.44 | 0.04411085  |
| <b>Egflam</b>     | 0.50  | 0.006853085 | <b>Eps8l1</b>    | -0.58 | 0.044230408 |
| <b>Scara3</b>     | 1.84  | 0.006994451 | <b>Pard3bos3</b> | -1.26 | 0.044248429 |
| <b>Btnl9</b>      | -0.78 | 0.007005095 | <b>Spp2</b>      | -0.64 | 0.04457674  |
| <b>Lsmem1</b>     | 1.03  | 0.00707001  | <b>Scrn2</b>     | -0.67 | 0.045363229 |
| <b>Ddo</b>        | -0.40 | 0.007081921 | <b>Vwa2</b>      | -0.46 | 0.045760312 |
| <b>Slc17a4</b>    | -1.12 | 0.007081921 | <b>Txlng</b>     | -0.33 | 0.045806295 |
| <b>Atp8b5</b>     | 0.89  | 0.007081921 | <b>Celsr2</b>    | -0.36 | 0.045837082 |
| <b>Neurog2</b>    | -1.15 | 0.007176829 | <b>Mgst1</b>     | 0.49  | 0.045912116 |
| <b>Ptprq</b>      | 1.47  | 0.007231643 | <b>Syt2</b>      | 1.05  | 0.045915511 |
| <b>Mybl1</b>      | 0.83  | 0.007268832 | <b>Mpzl2</b>     | 0.62  | 0.045965473 |
| <b>Snhg15</b>     | 0.93  | 0.007297226 | <b>Pdzk1</b>     | -0.55 | 0.045965473 |
| <b>Oasl1</b>      | 0.92  | 0.007297226 | <b>Cdkl1</b>     | -0.48 | 0.046124427 |
| <b>Fam149a</b>    | -0.59 | 0.007328242 | <b>Myrf1</b>     | 0.88  | 0.046390059 |
| <b>Nectin1</b>    | 0.53  | 0.007364756 | <b>Irak3</b>     | 0.73  | 0.046390059 |
| <b>Acad12</b>     | -0.42 | 0.007390619 | <b>D630003M2</b> |       |             |
| <b>A330015K06</b> |       |             | <b>1Rik</b>      | -0.72 | 0.046390059 |
| <b>Rik</b>        | 1.20  | 0.007390619 | <b>Ccdc180</b>   | -1.11 | 0.046390059 |
| <b>1810064F22</b> |       |             |                  |       |             |
| <b>Rik</b>        | 1.25  | 0.00742241  | <b>Chst7</b>     | -0.78 | 0.046398145 |
| <b>Gm1604a</b>    | 1.08  | 0.007542888 | <b>Fcgbp</b>     | -2.12 | 0.046398145 |
| <b>Cys1</b>       | -0.59 | 0.007574571 | <b>Procr</b>     | 1.02  | 0.046662811 |
| <b>Dnajc12</b>    | -0.70 | 0.007701768 | <b>Rnf145</b>    | -0.35 | 0.046700417 |
| <b>Gria3</b>      | 0.60  | 0.007764025 | <b>Gm43568</b>   | -0.68 | 0.046972621 |
| <b>Glyctk</b>     | -0.62 | 0.007764025 | <b>Spats2l</b>   | -0.64 | 0.047350128 |
| <b>Ak4</b>        | -0.67 | 0.007844291 | <b>Gm6999</b>    | 0.57  | 0.047350128 |
| <b>Clec12a</b>    | 0.87  | 0.00788046  | <b>Acat1</b>     | -0.48 | 0.047350128 |
| <b>2010300C02</b> |       |             |                  |       |             |
| <b>Rik</b>        | -0.82 | 0.00788046  | <b>Gm15264</b>   | 0.56  | 0.047418026 |
| <b>Nrep</b>       | -0.82 | 0.007899711 | <b>Myof</b>      | 0.75  | 0.047418026 |
| <b>Aldh1a3</b>    | -3.40 | 0.008037724 | <b>Akr1b7</b>    | 0.92  | 0.047566544 |
| <b>Wnt11</b>      | -2.65 | 0.008046393 | <b>Impg2</b>     | 0.52  | 0.047747713 |
| <b>Slc15a1</b>    | 1.02  | 0.00817401  | <b>Tgfbi</b>     | 0.51  | 0.047756606 |
| <b>Arhgap27</b>   | -0.42 | 0.008283679 | <b>Klf6</b>      | 0.37  | 0.047888831 |
| <b>Gm45083</b>    | 0.63  | 0.008453823 | <b>Tmem150a</b>  | -0.55 | 0.047888831 |
| <b>Xkr4</b>       | 0.88  | 0.00849699  | <b>P4ha1</b>     | -0.40 | 0.047976242 |
| <b>Tcf23</b>      | 2.03  | 0.008745751 | <b>Ccnb1</b>     | 1.03  | 0.048066198 |
| <b>Trim9</b>      | 2.05  | 0.008782161 | <b>Msi1</b>      | 0.95  | 0.048066198 |
| <b>Ltbp2</b>      | 1.87  | 0.008873874 | <b>Gcnt3</b>     | -2.96 | 0.048066198 |
| <b>Vwa3a</b>      | 0.88  | 0.008873874 | <b>Nek6</b>      | 0.37  | 0.048066198 |

|                   |       |             |                |       |             |
|-------------------|-------|-------------|----------------|-------|-------------|
| <b>Igfbp4</b>     | -0.80 | 0.008874681 | <b>Knstrn</b>  | 0.71  | 0.048614289 |
| <b>Gm20755</b>    | 1.10  | 0.009074906 | <b>Tubb6</b>   | 0.80  | 0.048614289 |
| <b>Adh6b</b>      | 2.64  | 0.009100906 | <b>Fam169b</b> | -0.36 | 0.048853805 |
| <b>Acsbg1</b>     | 1.22  | 0.009104592 | <b>Cfh</b>     | 0.49  | 0.048971437 |
| <b>Slc16a13</b>   | -0.74 | 0.009104592 | <b>Tlr13</b>   | 0.85  | 0.0490811   |
| <b>Ogn</b>        | 0.71  | 0.009161829 | <b>Srpx</b>    | 0.84  | 0.049755752 |
| <b>C330027C09</b> |       |             |                |       |             |
| <b>Rik</b>        | 0.77  | 0.009381493 | <b>Rnf183</b>  | -0.63 | 0.04998003  |
| <b>Unc13c</b>     | -1.09 | 0.009392039 |                |       |             |



**Table S2.** Upstream regulator analysis: Control versus diabetic ApoE<sup>-/-</sup> mice.

| Upstream Regulator | Predicted Activation State | Activation z-score | p-value of overlap |
|--------------------|----------------------------|--------------------|--------------------|
| TRIM24             | Inhibited                  | -3.317             | 0.00000441         |
| NEUROG1            | Inhibited                  | -3.162             | 0.00000861         |
| SPARC              | Inhibited                  | -3.162             | 0.000752           |
| Irgm1              | Inhibited                  | -3.148             | 0.000000342        |
| IRF4               | Inhibited                  | -2.946             | 0.00054            |
| ATP7B              | Inhibited                  | -2.828             | 0.00000143         |
| KDM5B              | Inhibited                  | -2.651             | 0.00203            |
| HSF1               | Inhibited                  | -2.46              | 4.95E-11           |
| GLIS2              | Inhibited                  | -2.449             | 0.00000381         |
| miR-34a-5p         | Inhibited                  | -2.443             | 0.000564           |
| Alpha catenin      | Inhibited                  | -2.388             | 0.000165           |
| AURK               | Inhibited                  | -2.345             | 0.00000895         |
| ANLN               | Inhibited                  | -2.333             | 0.00000895         |
| CBX5               | Inhibited                  | -2.333             | 0.00156            |
| TAB1               | Inhibited                  | -2.236             | 0.000367           |
| BNIP3L             | Inhibited                  | -2.219             | 0.0191             |
| ABCB4              | Inhibited                  | -2.216             | 0.00119            |
| ZFP36              | Inhibited                  | -2.213             | 0.000564           |
| SCAP               | Inhibited                  | -2.183             | 0.0151             |
| RB1                | Inhibited                  | -2.138             | 0.272              |
| CD38               | Inhibited                  | -2.111             | 0.00383            |
| PPARG              | Inhibited                  | -2.044             | 0.000000506        |
| SAV1               | Inhibited                  | -2                 | 0.0000237          |
| MST1               | Inhibited                  | -2                 | 0.0000813          |
| STAR               | Inhibited                  | -2                 | 0.000298           |
| STK3               | Inhibited                  | -2                 | 0.00042            |
| TSC2               | Inhibited                  | -2                 | 0.0117             |
| LRP1               | Inhibited                  | -2                 | 0.0122             |
| ACKR2              | Inhibited                  | -2                 | 0.0223             |
| PRNP               | Inhibited                  | -2                 | 0.0513             |
| MAPK14             | Activated                  | 2.04               | 0.00215            |
| IL17A              | Activated                  | 2.06               | 0.0673             |
| ERBB2              | Activated                  | 2.064              | 4.91E-14           |
| FGFR1              | Activated                  | 2.091              | 0.0514             |
| FOXM1              | Activated                  | 2.094              | 0.0000772          |
| IFNG               | Activated                  | 2.097              | 0.000033           |
| PRKCD              | Activated                  | 2.131              | 0.00000726         |
| Vegf               | Activated                  | 2.138              | 0.000596           |
| TLR9               | Activated                  | 2.141              | 0.00778            |

|          |           |       |            |
|----------|-----------|-------|------------|
| TAL1     | Activated | 2.145 | 0.00278    |
| IFNB1    | Activated | 2.151 | 0.000157   |
| SRF      | Activated | 2.158 | 0.00111    |
| VEGFA    | Activated | 2.162 | 0.000205   |
| F2       | Activated | 2.177 | 0.000565   |
| HRAS     | Activated | 2.19  | 0.000124   |
| FOXO3    | Activated | 2.195 | 0.000051   |
| TREM1    | Activated | 2.197 | 0.000579   |
| KITLG    | Activated | 2.197 | 0.0151     |
| E2f      | Activated | 2.2   | 0.0016     |
| MAP2K4   | Activated | 2.213 | 0.0014     |
| TLR2     | Activated | 2.23  | 0.309      |
| NFATC2   | Activated | 2.236 | 0.0126     |
| IL12B    | Activated | 2.236 | 0.0164     |
| RELA     | Activated | 2.248 | 0.0000999  |
| EZH2     | Activated | 2.263 | 0.0000672  |
| mir-223  | Activated | 2.331 | 0.000129   |
| RETNLB   | Activated | 2.345 | 0.000301   |
| LCN2     | Activated | 2.353 | 0.00264    |
| NR1I3    | Activated | 2.371 | 0.0000567  |
| CREB1    | Activated | 2.375 | 0.00000291 |
| AKT1     | Activated | 2.376 | 0.0000568  |
| IFNAR1   | Activated | 2.378 | 0.00501    |
| CYP1A1   | Activated | 2.4   | 0.00591    |
| ERK      | Activated | 2.412 | 0.000472   |
| Akt      | Activated | 2.415 | 0.000326   |
| ELAVL1   | Activated | 2.433 | 0.0108     |
| TNFRSF1A | Activated | 2.439 | 0.0000321  |
| HTT      | Activated | 2.449 | 1.04E-08   |
| NQO1     | Activated | 2.449 | 0.000482   |
| TMEM173  | Activated | 2.449 | 0.00131    |
| HIPK2    | Activated | 2.449 | 0.00741    |
| CCND1    | Activated | 2.466 | 4.23E-11   |
| CHUK     | Activated | 2.535 | 0.0000024  |
| IKBKB    | Activated | 2.548 | 1.1E-09    |
| Ifnar    | Activated | 2.592 | 0.0122     |
| CREBBP   | Activated | 2.599 | 0.0292     |
| Jnk      | Activated | 2.613 | 0.00000119 |
| SMARCA4  | Activated | 2.64  | 0.000997   |
| NEDD9    | Activated | 2.646 | 0.0000707  |
| ERK1/2   | Activated | 2.765 | 0.0000672  |

|                |           |       |             |
|----------------|-----------|-------|-------------|
| PDGF BB        | Activated | 2.777 | 0.000151    |
| Cg             | Activated | 2.823 | 1E-12       |
| PTGER2         | Activated | 2.84  | 1.31E-08    |
| NFkB (complex) | Activated | 2.843 | 0.000311    |
| TICAM1         | Activated | 2.883 | 0.0107      |
| RIPK2          | Activated | 2.918 | 0.000139    |
| MYD88          | Activated | 2.938 | 0.0000623   |
| TGFB1          | Activated | 2.957 | 2.53E-11    |
| TP53           | Activated | 3.005 | 1.6E-21     |
| FOXO1          | Activated | 3.102 | 0.000000193 |
| IKBKG          | Activated | 3.182 | 0.0000102   |
| TLR3           | Activated | 3.201 | 0.00235     |
| P38 MAPK       | Activated | 3.283 | 0.00000115  |
| RABL6          | Activated | 3.317 | 0.00000262  |
| TNF            | Activated | 3.377 | 2.47E-09    |
| CSF2           | Activated | 4.176 | 1.29E-11    |

**Table S3.** Upstream regulator analysis: Diabetic versus Diabetic + LXA<sub>4</sub> or Benzo-LXA<sub>4</sub> treated ApoE<sup>-/-</sup> mice.

| Upstream Regulator | Molecule Type                     | Predicted Activation State | Activation z-score | p-value of overlap |
|--------------------|-----------------------------------|----------------------------|--------------------|--------------------|
| PDGF BB            | complex                           | Inhibited                  | -3.213             | 0.00000641         |
| SREBF1             | transcription regulator           | Inhibited                  | -2.795             | 0.00199            |
| RABL6              | other                             | Inhibited                  | -2.449             | 0.0409             |
| PTPN1              | phosphatase                       | Inhibited                  | -2.425             | 0.00692            |
| C3                 | peptidase                         | Inhibited                  | -2.4               | 0.00429            |
| Growth hormone     | group                             | Inhibited                  | -2.345             | 0.00025            |
| NCOA1              | transcription regulator           | Inhibited                  | -2.236             | 0.144              |
| PI3K (family)      | group                             | Inhibited                  | -2.225             | 0.00584            |
| NR1I2              | ligand-dependent nuclear receptor | Inhibited                  | -2.224             | 0.398              |
| PLIN5              | other                             | Inhibited                  | -2.219             | 0.00417            |
| let-7              | microrna                          | Inhibited                  | -2.2               | 0.0356             |
| AR                 | ligand-dependent nuclear receptor | Inhibited                  | -2.171             | 0.207              |
| PGR                | receptor                          | Inhibited                  | -2.13              | 0.000223           |
| GMNN               | transcription regulator           | Inhibited                  | -2.121             | 0.0127             |
| PTEN               | phosphatase                       | Inhibited                  | -2.09              | 0.242              |
| TNF                | cytokine                          | Inhibited                  | -2.09              | 0.0000856          |
| IL27               | cytokine                          | Inhibited                  | -2.082             | 0.0034             |
| TREM1              | transmembrane receptor            | Inhibited                  | -2.07              | 0.135              |
| AHR                | ligand-dependent nuclear receptor | Inhibited                  | -2.044             | 0.000000756        |
| HAND1              | transcription regulator           | Inhibited                  | -2                 | 0.000851           |
| ATP7B              | transporter                       | Inhibited                  | -2                 | 0.0172             |
| miR-182-5p         | mature microrna                   | Inhibited                  | -2                 | 0.0314             |
| TNFRSF1B           | transmembrane receptor            | Inhibited                  | -2                 | 0.0977             |
| APC                | enzyme                            | Inhibited                  | -2                 | 0.145              |
| UPF2               | other                             | Inhibited                  | -2                 | 0.0395             |
| BMP15              | growth factor                     | Activated                  | 2                  | 0.000888           |
| KDM1A              | enzyme                            | Activated                  | 2                  | 0.0754             |
| HDAC1              | transcription regulator           | Activated                  | 2.121              | 0.0152             |
| FADD               | other                             | Activated                  | 2.219              | 0.15               |
| BACH2              | transcription regulator           | Activated                  | 2.236              | 0.0253             |
| H2AFY              | other                             | Activated                  | 2.236              | 0.00645            |
| KLF4               | transcription regulator           | Activated                  | 2.299              | 0.0468             |
| FIGLA              | transcription regulator           | Activated                  | 2.387              | 0.0233             |
| NR3C1              | ligand-dependent nuclear receptor | Activated                  | 2.401              | 0.0809             |

|        |                                      |           |       |             |
|--------|--------------------------------------|-----------|-------|-------------|
| PPARA  | ligand-dependent nuclear<br>receptor | Activated | 2.581 | 0.000000039 |
| RICTOR | other                                | Activated | 3.308 | 0.00678     |

**Table S4.** Differentially expressed genes: Diabetic versus Diabetic + LXA<sub>4</sub> treated ApoE<sup>-/-</sup> mice.

| <b>Gene ID</b>       | <b>logFC</b> | <b>FDR (CORRECTED P-VALUE)</b> |
|----------------------|--------------|--------------------------------|
| <b>Egr1</b>          | -1.43        | 2.06E-07                       |
| <b>1600010M07Rik</b> | 1.24         | 0.004551304                    |
| <b>Rorc</b>          | 1.04         | 0.005418383                    |
| <b>Jchain</b>        | -1.48        | 0.005443802                    |
| <b>Gm15441</b>       | 1.47         | 0.005443802                    |
| <b>Lamb3</b>         | 0.93         | 0.006032177                    |
| <b>Fcnaos</b>        | 1.11         | 0.006357033                    |
| <b>Gm45064</b>       | -1.47        | 0.007896206                    |
| <b>Msmo1</b>         | -0.75        | 0.008307286                    |
| <b>Cyp2c69</b>       | -1.61        | 0.00904752                     |
| <b>Iglc1</b>         | -2.51        | 0.010555067                    |
| <b>Insig1</b>        | -0.79        | 0.015245182                    |
| <b>Igfbp1</b>        | -1.19        | 0.015245182                    |
| <b>Lrat</b>          | -1.24        | 0.020743571                    |
| <b>Ngef</b>          | 0.57         | 0.020743571                    |
| <b>Tfr3</b>          | -0.73        | 0.027328174                    |
| <b>Aldh1a3</b>       | 4.27         | 0.035119141                    |
| <b>Adamts13</b>      | 1.10         | 0.040081492                    |
| <b>Per2</b>          | 1.11         | 0.040081492                    |
| <b>Lonrf3</b>        | 0.94         | 0.049713619                    |

**Table S5.** Differentially expressed genes: Diabetic versus Diabetic + Benzo-LXA<sub>4</sub> treated ApoE<sup>-/-</sup> mice.

| <b>GeneID</b> | <b>logFC</b> | <b>FDR (CORRECTED P-VALUE)</b> |
|---------------|--------------|--------------------------------|
| Capn11        | 2.86         | 5.79E-08                       |
| Socs2         | 0.90         | 5.79E-08                       |
| Egr1          | 0.93         | 1.20E-05                       |
| Hbb-bs        | 1.21         | 0.000125237                    |
| Hba-a2        | 0.98         | 0.000237253                    |
| Glt1d1        | -0.71        | 0.000260207                    |
| Ngef          | -0.47        | 0.000260207                    |
| Prr5          | 0.54         | 0.000299969                    |
| 8430408G22Rik | -1.18        | 0.000340402                    |
| Pak7          | 2.07         | 0.000373996                    |
| Hba-a1        | 0.91         | 0.001281152                    |
| Dscaml1       | -1.01        | 0.001550101                    |
| Cfd           | 5.19         | 0.001877703                    |
| Atp2b2        | -0.57        | 0.002746252                    |
| Plau          | 0.60         | 0.003776998                    |
| Kcnma1        | 0.77         | 0.008654365                    |
| Gm4450        | 0.52         | 0.00994191                     |
| Gm16010       | 1.49         | 0.011420084                    |
| Nat8f6        | -0.87        | 0.012461811                    |
| Angptl7       | -1.05        | 0.01523872                     |
| Slc7a12       | 2.22         | 0.01523872                     |
| Igfals        | 0.78         | 0.01523872                     |
| G6pc          | -0.47        | 0.01523872                     |
| Erdr1         | -2.94        | 0.01526526                     |
| Lamb3         | -0.62        | 0.020141288                    |
| Gm13052       | -0.66        | 0.020141288                    |
| Zbtb40        | -0.39        | 0.020798055                    |
| Insrr         | -0.62        | 0.021177013                    |
| Csgalnact1    | 0.39         | 0.021332777                    |
| D630039A03Rik | 0.63         | 0.022088759                    |
| Ucp1          | 4.59         | 0.022088759                    |
| Tfr2          | -1.51        | 0.023870615                    |
| Halr1         | 0.82         | 0.025706594                    |
| Nr4a1         | 1.16         | 0.025706594                    |
| Cish          | 1.00         | 0.027261422                    |
| Alk           | 0.66         | 0.031167045                    |
| Gm10787       | -0.92        | 0.032380875                    |



|                 |       |             |
|-----------------|-------|-------------|
| <b>Retn</b>     | 4.21  | 0.032789954 |
| <b>Gm17189</b>  | -0.72 | 0.033243619 |
| <b>Tmem37</b>   | 0.89  | 0.034670499 |
| <b>Pitpnm2</b>  | -0.35 | 0.035585409 |
| <b>Gpc3</b>     | 0.55  | 0.035585409 |
| <b>Adamtsl3</b> | -0.98 | 0.036717043 |
| <b>Kyat1</b>    | -0.34 | 0.036955478 |
| <b>Ybx2</b>     | -0.43 | 0.039671637 |
| <b>Ncor2</b>    | -0.36 | 0.039671637 |
| <b>Aim1</b>     | -0.32 | 0.039671637 |
| <b>Slc7a7</b>   | 0.50  | 0.039671637 |
| <b>Hspa1a</b>   | -0.80 | 0.039767456 |
| <b>Slc15a4</b>  | -0.32 | 0.045446994 |
| <b>Tspan18</b>  | -0.42 | 0.049402702 |

---

**Table S6.** TFBS promoter analysis of differentially expressed genes from ApoE<sup>-/-</sup> RNA seq experiment

| <b>Control versus diabetic ApoE<sup>-/-</sup> mice.</b> |                            | <b>diabetic ApoE<sup>-/-</sup> VS diabetic ApoE<sup>-/-</sup> + LXA4</b> |                            | <b>diabetic ApoE<sup>-/-</sup> VS diabetic ApoE<sup>-/-</sup> + Benzo-LXA4</b> |                            |
|---------------------------------------------------------|----------------------------|--------------------------------------------------------------------------|----------------------------|--------------------------------------------------------------------------------|----------------------------|
| <b>TF Families</b>                                      | <b>Z-Score (promoters)</b> | <b>TF Families</b>                                                       | <b>Z-Score (promoters)</b> | <b>TF Families</b>                                                             | <b>Z-Score (promoters)</b> |
| V\$ZF5F                                                 | 18.42                      | V\$ZF5F                                                                  | 14.35                      | V\$ZF02                                                                        | 21.04                      |
| V\$E2FF                                                 | 16.33                      | V\$E2FF                                                                  | 8.11                       | V\$EGRF                                                                        | 19.43                      |
| V\$ZF02                                                 | 13.38                      | V\$NRF1                                                                  | 7.83                       | V\$BEDF                                                                        | 16.07                      |
| V\$NRF1                                                 | 13.16                      | V\$ZF02                                                                  | 7.63                       | V\$PLAG                                                                        | 15.96                      |
| V\$EGRF                                                 | 12.74                      | V\$EGRF                                                                  | 6.84                       | V\$SP1F                                                                        | 14.91                      |
| V\$GABF                                                 | 11.71                      | V\$HNFP                                                                  | 5.88                       | V\$KLFS                                                                        | 14.91                      |
| V\$BEDF                                                 | 11.71                      | V\$BEDF                                                                  | 5.76                       | V\$ZTRE                                                                        | 13.92                      |
| V\$SP1F                                                 | 11.07                      | V\$GCF2                                                                  | 5.43                       | V\$GCF2                                                                        | 13.43                      |
| V\$ZTRE                                                 | 10.76                      | V\$SP1F                                                                  | 5.19                       | V\$MAZF                                                                        | 12.81                      |
| V\$CTCF                                                 | 10.31                      | V\$CDEF                                                                  | 5.04                       | V\$CTCF                                                                        | 12.19                      |
| V\$MAZF                                                 | 9.85                       | V\$PLAG                                                                  | 4.72                       | O\$XCPE                                                                        | 12.11                      |
| V\$KLFS                                                 | 9.16                       | V\$EBOX                                                                  | 4.72                       | V\$GLIF                                                                        | 11.68                      |
| V\$PLAG                                                 | 8.87                       | V\$MAZF                                                                  | 4.52                       | V\$E2FF                                                                        | 10.34                      |
| O\$XCPE                                                 | 8.45                       | V\$NDPK                                                                  | 4.31                       | V\$AP2F                                                                        | 10.08                      |
| O\$MTEN                                                 | 8.43                       | V\$OAZF                                                                  | 4.3                        | V\$ZF5F                                                                        | 10.05                      |
| V\$CDEF                                                 | 8.3                        | V\$HESF                                                                  | 4.27                       | V\$NDPK                                                                        | 9.98                       |
| V\$NDPK                                                 | 7.84                       | V\$AP2F                                                                  | 4.21                       | V\$NOLF                                                                        | 7.19                       |
| V\$HDBP                                                 | 7.8                        | V\$GLIF                                                                  | 4.21                       | V\$NFKB                                                                        | 7.11                       |
| V\$GCF2                                                 | 7.03                       | V\$AHRR                                                                  | 4.1                        | V\$STAF                                                                        | 6.99                       |
| V\$HNFP                                                 | 6.72                       | V\$CTCF                                                                  | 3.91                       | V\$ZF07                                                                        | 6.75                       |
| V\$OAZF                                                 | 6.26                       | V\$ZTRE                                                                  | 3.87                       | V\$RXRF                                                                        | 6.66                       |
| O\$TF2B                                                 | 6.24                       | V\$BNCF                                                                  | 3.67                       | O\$MTEN                                                                        | 6.63                       |
| V\$GLIF                                                 | 6.22                       | V\$ZFXF                                                                  | 3.64                       | V\$MZF1                                                                        | 6.63                       |
| V\$ZF15                                                 | 5.87                       | O\$MTEN                                                                  | 3.59                       | V\$RREB                                                                        | 6.47                       |
| V\$AHRR                                                 | 5.66                       | V\$KLFS                                                                  | 3.53                       | V\$HDBP                                                                        | 6.23                       |
| V\$EBOX                                                 | 5.33                       | V\$ZF07                                                                  | 3.46                       | V\$HESF                                                                        | 6.15                       |
| V\$NFKB                                                 | 5.06                       | V\$CHRE                                                                  | 3.37                       | V\$GCMF                                                                        | 5.98                       |
| V\$HESF                                                 | 5                          | V\$NF1F                                                                  | 3.23                       | V\$INSM                                                                        | 5.95                       |
| V\$MZF1                                                 | 4.94                       | V\$NRSF                                                                  | 3.21                       | V\$NRF1                                                                        | 5.86                       |
| V\$ZF57                                                 | 4.68                       | O\$XCPE                                                                  | 3.16                       | V\$SPZ1                                                                        | 5.83                       |
| V\$ZF07                                                 | 4.52                       | V\$ZF57                                                                  | 3.13                       | V\$SAL2                                                                        | 5.77                       |
| V\$PAX9                                                 | 4.47                       | V\$SMAD                                                                  | 3.01                       | V\$NRSF                                                                        | 5.2                        |
| V\$NOLF                                                 | 4.33                       | V\$HAND                                                                  | 2.97                       | V\$SMAD                                                                        | 4.95                       |
| V\$MTF1                                                 | 4.32                       | V\$GABF                                                                  | 2.8                        | V\$PEG3                                                                        | 4.88                       |
| V\$SAL2                                                 | 4.23                       | V\$MOKF                                                                  | 2.76                       | V\$PURA                                                                        | 4.54                       |
| V\$AP2F                                                 | 4.14                       | V\$ZF11                                                                  | 2.72                       | V\$ZF57                                                                        | 4.49                       |
| V\$NRSF                                                 | 4.05                       | V\$NOLF                                                                  | 2.71                       | V\$BNCF                                                                        | 4.32                       |
| V\$WHNF                                                 | 4.02                       | V\$NFKB                                                                  | 2.68                       | V\$EBOX                                                                        | 4.26                       |

|         |      |         |      |         |      |
|---------|------|---------|------|---------|------|
| V\$PRDM | 3.77 | V\$MTF1 | 2.38 | V\$PAX5 | 4.15 |
| V\$ZICF | 3.51 | V\$SPZ1 | 2.34 | V\$NF1F | 4.04 |
| V\$HIFF | 3.44 | V\$IKRS | 2.26 | V\$CHRE | 3.97 |
| V\$CHRE | 3.32 | V\$ZICF | 2.25 | V\$ZF11 | 3.84 |
| V\$MIZ1 | 3.04 | V\$THAP | 2.19 | V\$ZFXF | 3.66 |
| V\$PERO | 2.94 | V\$ZF15 | 2.18 | V\$NR2F | 3.57 |
| V\$NF1F | 2.94 | V\$MIZ1 | 2.08 | V\$AHRR | 3.53 |
| V\$GCMF | 2.93 | V\$RXRF | 2.08 | V\$OAZF | 3.47 |
| V\$PURA | 2.82 | V\$MYOD | 2.03 | V\$PRDM | 3.46 |
| V\$HEAT | 2.8  | V\$LTFM | 1.99 | V\$ZICF | 3.44 |
| V\$PAX5 | 2.75 | V\$HDBP | 1.97 | V\$ESRR | 3.41 |
| V\$STAF | 2.62 | V\$CREB | 1.97 | V\$CDEF | 3.3  |
| V\$CARE | 2.59 | V\$AP4R | 1.88 | O\$TF2B | 3    |
| V\$INSM | 2.46 | V\$PAX9 | 1.75 | V\$MIZ1 | 3    |
| V\$GTBX | 2.44 | V\$DICE | 1.74 | V\$HNFP | 2.83 |
| V\$AP4R | 2.39 | V\$HIFF | 1.71 | V\$MYOD | 2.6  |
| V\$ZBED | 2.21 | V\$ZF04 | 1.69 | V\$PAX9 | 2.59 |
| V\$ZFHX | 2.13 | V\$RREB | 1.68 | V\$DMTF | 2.47 |
| V\$DEAF | 2.11 | V\$STAF | 1.57 | V\$EREF | 2.45 |
| V\$ETSF | 2.04 | O\$TF2B | 1.56 | V\$SRFF | 2.43 |
| V\$MYBL | 2    | V\$CSEN | 1.5  | V\$ZF35 | 2.42 |
| V\$ZF35 | 2    | V\$SAL2 | 1.47 | V\$SF1F | 2.36 |
| V\$SREB | 2    | V\$INSM | 1.46 | V\$ZF04 | 2.27 |
| V\$MYOD | 1.93 | V\$TEAF | 1.46 | V\$YBXF | 2.27 |
| V\$HZIP | 1.87 | V\$ZF01 | 1.38 | V\$HICF | 2.26 |
| V\$HASF | 1.86 | V\$CARE | 1.18 | V\$RBPF | 2.26 |
| V\$FXRE | 1.71 | V\$RBPF | 1.09 | V\$PERO | 2.24 |
| V\$PRDF | 1.7  | V\$GRHL | 1.01 | V\$HIFF | 2.19 |
| V\$NGRE | 1.69 | V\$MEF3 | 0.99 | V\$NACA | 2.16 |
| V\$DMTF | 1.63 | V\$EREF | 0.97 | V\$TAIP | 1.95 |
| V\$RREB | 1.62 | V\$PRDM | 0.96 | V\$HASF | 1.88 |
| V\$PROX | 1.4  | V\$MZF1 | 0.93 | V\$MOKF | 1.88 |
| V\$SNAI | 1.39 | V\$NEUR | 0.9  | V\$PTF1 | 1.86 |
| V\$XBBF | 1.35 | V\$CP2F | 0.87 | V\$RORA | 1.84 |
| V\$ESRR | 1.32 | V\$PROX | 0.79 | V\$HAND | 1.74 |
| V\$AP1R | 1.31 | V\$SNAI | 0.75 | V\$LTFM | 1.68 |
| V\$CP2F | 1.19 | V\$NGRE | 0.69 | V\$DEAF | 1.63 |
| V\$RBPF | 1.18 | V\$PAX5 | 0.69 | V\$WHNF | 1.61 |
| V\$P53F | 1.17 | V\$TALE | 0.69 | V\$CARE | 1.59 |
| V\$BARB | 1.15 | V\$DMTF | 0.6  | V\$GTBX | 1.58 |
| V\$SMAD | 1.13 | V\$SRFF | 0.57 | V\$NGRE | 1.49 |
| V\$DICE | 1.09 | V\$GCMF | 0.56 | V\$SREB | 1.45 |
| V\$ZF11 | 1.04 | V\$E4FF | 0.56 | V\$ZF10 | 1.43 |

|         |       |         |       |         |       |
|---------|-------|---------|-------|---------|-------|
| V\$NACA | 0.99  | V\$NACA | 0.52  | V\$CP2F | 1.4   |
| O\$INRE | 0.98  | V\$MYRF | 0.5   | V\$RBP2 | 1.36  |
| V\$NR2F | 0.91  | V\$RBP2 | 0.49  | V\$P53F | 1.35  |
| V\$YBXF | 0.91  | V\$ZF35 | 0.46  | V\$CSEN | 1.29  |
| O\$TF2D | 0.91  | V\$ZF06 | 0.42  | V\$AP1R | 1.27  |
| V\$SPZ1 | 0.89  | V\$NFAT | 0.4   | V\$NEUR | 1.18  |
| V\$CHOP | 0.89  | V\$ESRR | 0.33  | V\$SNAI | 1.17  |
| V\$RXRF | 0.89  | V\$HICF | 0.29  | V\$XBBF | 1.16  |
| V\$RBP2 | 0.83  | V\$SF1F | 0.28  | V\$ZF01 | 1.15  |
| V\$IRFF | 0.83  | V\$NKX1 | 0.27  | V\$IKRS | 1.13  |
| V\$TALE | 0.75  | V\$ZBED | 0.23  | V\$MYRF | 1.08  |
| V\$MOKF | 0.72  | V\$YBXF | 0.21  | V\$CAAT | 1.05  |
| V\$PAX1 | 0.71  | V\$SREB | 0.19  | V\$DICE | 1.02  |
| V\$PAX3 | 0.62  | V\$ZFHX | 0.19  | O\$TELO | 1.01  |
| V\$NBRE | 0.61  | V\$BRAC | 0.18  | V\$NBRE | 1     |
| V\$PAX6 | 0.58  | V\$P53F | 0.17  | V\$GREF | 0.97  |
| V\$GRHL | 0.57  | V\$PPAR | 0.13  | V\$AP4R | 0.92  |
| V\$AP1F | 0.54  | O\$TF2D | 0.11  | V\$MTF1 | 0.84  |
| V\$NFAT | 0.49  | V\$PURA | 0.06  | V\$PAX3 | 0.76  |
| V\$GCNR | 0.47  | V\$AP1R | 0.01  | V\$PAX6 | 0.64  |
| V\$SF1F | 0.45  | V\$ZF03 | 0     | V\$BRAC | 0.55  |
| V\$GMEB | 0.44  | V\$HASF | -0.01 | V\$HAML | 0.54  |
| V\$GZF1 | 0.42  | V\$WHNF | -0.02 | V\$CIZF | 0.53  |
| V\$ZF01 | 0.34  | V\$GTBX | -0.03 | V\$TALE | 0.52  |
| O\$TELO | 0.27  | V\$GFI1 | -0.04 | V\$ZF08 | 0.5   |
| V\$IKZF | 0.24  | V\$PERO | -0.05 | V\$YY1F | 0.48  |
| V\$BCL6 | 0.17  | O\$TELO | -0.06 | V\$GCNR | 0.45  |
| V\$MYT1 | 0.12  | V\$PTF1 | -0.06 | V\$BTBF | 0.45  |
| V\$PCBE | 0.02  | V\$DEAF | -0.08 | V\$ZF06 | 0.37  |
| V\$IKRS | -0.03 | V\$HZIP | -0.15 | V\$ZFHX | 0.36  |
| V\$OSRF | -0.05 | V\$PAX1 | -0.19 | V\$FXRE | 0.31  |
| O\$TF3A | -0.05 | V\$GMEB | -0.28 | V\$GRHL | 0.28  |
| V\$ZF08 | -0.05 | V\$PCBE | -0.37 | V\$PBXC | 0.28  |
| V\$GFI1 | -0.07 | O\$TF3C | -0.38 | V\$GMEB | 0.23  |
| V\$TCFF | -0.12 | V\$ZF09 | -0.39 | V\$THAP | 0.2   |
| V\$PEG3 | -0.14 | V\$CAAT | -0.41 | V\$IKZF | 0.16  |
| V\$CEBP | -0.15 | V\$DUXF | -0.44 | V\$ETSF | 0.13  |
| V\$CSEN | -0.22 | V\$RORA | -0.45 | V\$HEAT | -0.01 |
| V\$ZFXY | -0.22 | V\$HOXH | -0.45 | V\$MEF3 | -0.03 |
| V\$TEAF | -0.24 | V\$PAXH | -0.46 | V\$ZF15 | -0.05 |
| V\$CAAT | -0.32 | V\$BCL6 | -0.47 | V\$HUB1 | -0.05 |
| V\$GUCE | -0.38 | V\$TAIP | -0.5  | V\$GUCE | -0.26 |
| V\$HUB1 | -0.41 | V\$OVOL | -0.54 | V\$CHOP | -0.34 |

|         |       |         |       |         |       |
|---------|-------|---------|-------|---------|-------|
| V\$BTBF | -0.45 | V\$AP1F | -0.54 | V\$MITF | -0.39 |
| V\$BZIP | -0.49 | V\$NBRE | -0.55 | V\$CREB | -0.57 |
| V\$PBXC | -0.51 | V\$SIXF | -0.58 | V\$ZF09 | -0.58 |
| V\$STAT | -0.56 | V\$ZF05 | -0.58 | V\$ZBED | -0.61 |
| V\$MEF3 | -0.56 | V\$CHOP | -0.61 | V\$OSRF | -0.64 |
| V\$EREF | -0.59 | V\$NR2F | -0.66 | V\$PAX1 | -0.66 |
| V\$LTFM | -0.66 | V\$CHRF | -0.69 | V\$PPAR | -0.72 |
| V\$LTSM | -0.73 | V\$PBXC | -0.72 | V\$TEAF | -0.82 |
| V\$ZF12 | -0.73 | V\$FXRE | -0.78 | O\$TF3C | -1.02 |
| V\$HICF | -0.73 | V\$SAL1 | -0.83 | V\$BARB | -1.07 |
| V\$BRAC | -0.74 | V\$GZF1 | -0.86 | V\$LTSM | -1.07 |
| V\$CIZF | -0.92 | V\$ZF08 | -0.93 | V\$PROX | -1.11 |
| V\$OVOL | -0.93 | V\$BHLH | -0.93 | V\$RP58 | -1.13 |
| V\$ZF04 | -1    | V\$GUCE | -0.94 | V\$HZIP | -1.14 |
| V\$HMTB | -1.04 | V\$MYBL | -0.95 | V\$AP1F | -1.23 |
| V\$NEUR | -1.09 | V\$STAT | -0.96 | V\$ZF13 | -1.29 |
| V\$BNCF | -1.1  | V\$TCFF | -1.05 | O\$TF2D | -1.37 |
| V\$SAL1 | -1.11 | V\$PEG3 | -1.09 | V\$PCBE | -1.44 |
| V\$THAP | -1.11 | V\$GCNR | -1.09 | V\$E4FF | -1.47 |
| V\$ZF10 | -1.17 | V\$CEBP | -1.11 | V\$NFAT | -1.51 |
| V\$AARF | -1.23 | V\$PAX3 | -1.12 | V\$GABF | -1.65 |
| V\$ZF13 | -1.25 | V\$PAX6 | -1.12 | V\$SIX3 | -1.75 |
| V\$MYRF | -1.37 | V\$SIX3 | -1.14 | V\$RU49 | -1.8  |
| O\$TF3C | -1.39 | V\$HMTB | -1.16 | V\$CHRF | -1.81 |
| V\$PTF1 | -1.44 | V\$CIZF | -1.18 | V\$ZF14 | -1.82 |
| V\$HOXH | -1.45 | V\$ZF10 | -1.19 | V\$AARF | -1.95 |
| V\$SRFF | -1.5  | V\$PAX7 | -1.2  | V\$ZF05 | -1.96 |
| V\$RORA | -1.51 | V\$PRDF | -1.22 | V\$GFI1 | -1.97 |
| V\$TAIP | -1.54 | V\$PARF | -1.26 | V\$OVOL | -2.01 |
| V\$ZF14 | -1.68 | V\$ZF14 | -1.27 | V\$BCL6 | -2.21 |
| V\$SNAP | -1.72 | V\$SATB | -1.28 | V\$PRDF | -2.32 |
| V\$CREB | -1.75 | V\$XBBF | -1.29 | V\$ZF12 | -2.43 |
| V\$ZF06 | -1.81 | V\$IKZF | -1.31 | V\$SIXF | -2.56 |
| V\$RU49 | -1.96 | V\$YY1F | -1.34 | V\$HOXH | -2.56 |
| V\$RP58 | -2.01 | V\$PDX1 | -1.34 | V\$CABL | -2.63 |
| V\$E4FF | -2.04 | V\$ATBF | -1.35 | V\$ZF03 | -2.69 |
| V\$CHRF | -2.15 | V\$OSRF | -1.38 | V\$TCFF | -2.7  |
| V\$ZF03 | -2.21 | V\$DLXF | -1.38 | V\$CEBP | -2.78 |
| V\$STEM | -2.29 | V\$GATA | -1.52 | V\$GZF1 | -2.85 |
| V\$HAML | -2.3  | V\$ETSF | -1.67 | V\$STAT | -2.93 |
| V\$SATB | -2.35 | V\$BARB | -1.73 | V\$MYBL | -2.94 |
| V\$LEFF | -2.42 | V\$SNAP | -1.73 | V\$AIRE | -3.08 |
| V\$HAND | -2.46 | V\$BTBF | -1.76 | O\$INRE | -3.37 |

|         |       |         |       |         |        |
|---------|-------|---------|-------|---------|--------|
| V\$BPTF | -2.49 | V\$ZF13 | -1.77 | V\$BZIP | -3.43  |
| V\$PAX2 | -2.72 | V\$HUB1 | -1.81 | V\$HMTB | -3.58  |
| V\$GREF | -2.78 | V\$PIT1 | -1.82 | V\$SNAP | -3.67  |
| V\$CLOX | -2.86 | V\$HOMF | -1.84 | V\$IRFF | -3.74  |
| V\$PPAR | -2.9  | V\$HEAT | -1.85 | V\$SAL1 | -3.79  |
| V\$PAX7 | -3.06 | V\$AIRE | -1.88 | V\$BHLH | -3.83  |
| V\$ZF09 | -3.08 | V\$HAML | -1.91 | V\$HOXC | -4.04  |
| V\$SIXF | -3.25 | V\$MITF | -1.97 | V\$DUXF | -4.12  |
| V\$SIX3 | -3.3  | V\$BCDF | -2.01 | V\$BPTF | -4.22  |
| V\$HNF6 | -3.34 | V\$GREF | -2.03 | V\$PAX7 | -4.3   |
| V\$AIRE | -3.47 | O\$INRE | -2.07 | V\$RUSH | -4.33  |
| V\$EVI1 | -3.53 | V\$BPTF | -2.17 | V\$EVI1 | -4.41  |
| V\$DUXF | -3.57 | V\$RP58 | -2.19 | V\$FAST | -4.62  |
| V\$RUSH | -3.58 | V\$NKX6 | -2.25 | V\$LEFF | -4.71  |
| V\$ATBF | -3.65 | V\$RU49 | -2.26 | V\$PAX2 | -4.76  |
| O\$VTBP | -3.7  | V\$DMRT | -2.27 | V\$ATBF | -5.07  |
| V\$YY1F | -3.75 | V\$MYT1 | -2.28 | V\$IRXF | -5.11  |
| V\$ZF05 | -3.89 | V\$PLZF | -2.3  | V\$SATB | -5.21  |
| V\$PAXH | -3.94 | V\$FAST | -2.31 | V\$PLZF | -5.25  |
| V\$GATA | -3.98 | V\$HNF6 | -2.64 | V\$PAXH | -5.26  |
| V\$HNF1 | -4.04 | V\$BZIP | -2.68 | V\$CLOX | -5.26  |
| V\$MITF | -4.04 | V\$BRN5 | -2.69 | V\$BCDF | -5.35  |
| V\$FAST | -4.07 | V\$ZF12 | -2.74 | V\$NKX1 | -5.43  |
| V\$CABL | -4.27 | V\$LTSM | -2.81 | V\$MYT1 | -5.64  |
| V\$NKX1 | -4.34 | V\$CART | -2.96 | V\$PIT1 | -6.14  |
| V\$PLZF | -4.37 | V\$CABL | -3    | V\$STEM | -6.18  |
| V\$HOXC | -4.55 | V\$RUSH | -3    | V\$GATA | -6.24  |
| O\$PTBP | -4.59 | V\$LEFF | -3.03 | V\$PDX1 | -6.33  |
| V\$NKXH | -4.63 | V\$IRFF | -3.21 | V\$HNF6 | -6.76  |
| V\$DLXF | -4.63 | V\$MEF2 | -3.24 | V\$NKXH | -6.81  |
| V\$PDX1 | -4.66 | V\$EVI1 | -3.35 | V\$NKX6 | -7.63  |
| V\$PIT1 | -4.75 | V\$LHXF | -3.35 | V\$MEF2 | -7.7   |
| V\$BHLH | -4.78 | V\$ARID | -3.48 | V\$PARF | -7.84  |
| V\$CDXF | -4.88 | V\$HOXC | -3.63 | V\$DLXF | -7.95  |
| V\$PARF | -4.91 | V\$HNF1 | -3.78 | V\$DMRT | -8.4   |
| V\$NKX6 | -4.92 | V\$NKXH | -3.83 | V\$CDXF | -8.42  |
| V\$BCDF | -4.99 | V\$HBOX | -3.83 | V\$ARID | -9.36  |
| V\$MEF2 | -5.13 | O\$VTBP | -3.86 | V\$HOXF | -9.6   |
| V\$ABDB | -5.41 | V\$STEM | -3.97 | V\$HNF1 | -9.82  |
| V\$HOMF | -5.69 | V\$PAX2 | -4.03 | O\$PTBP | -10.06 |
| O\$YTBP | -5.73 | V\$HOXF | -4.04 | O\$YTBP | -10.22 |
| V\$IRXF | -6.08 | V\$CDXF | -4.16 | V\$BRN5 | -10.22 |
| V\$HBOX | -6.55 | O\$PTBP | -4.16 | V\$HBOX | -10.24 |

|         |        |         |       |         |        |
|---------|--------|---------|-------|---------|--------|
| V\$DMRT | -7.02  | V\$ABDB | -4.33 | V\$LHXF | -10.25 |
| V\$LHXF | -7.85  | V\$IRXF | -4.34 | V\$HOMF | -10.39 |
| V\$OCT1 | -8.07  | V\$FKHD | -4.36 | V\$ABDB | -10.41 |
| V\$BRN5 | -8.08  | O\$YTBP | -4.39 | O\$VTBP | -10.74 |
| V\$ARID | -8.15  | V\$CLOX | -4.4  | V\$CART | -11.93 |
| V\$HOXF | -8.42  | V\$OCT1 | -4.91 | V\$FKHD | -12.17 |
| V\$BRNF | -8.69  | V\$BRNF | -5.39 | V\$BRNF | -13    |
| V\$CART | -8.91  | V\$SORY | -8.43 | V\$OCT1 | -13.44 |
| V\$SORY | -9.6   |         |       | V\$SORY | -17.17 |
| V\$FKHD | -10.08 |         |       |         |        |



**Table S7 – PROVIDED AS SEPARATE .XLS FILE**

**Table S8.** Details of primers and probes used for all quantitative PCR gene expression analysis.

| NAME                           | DESCRIPTION                                     | ACCESSION | PROBE SEQUENCE 5' - 3'     | FORWARD PRIMER 5' - 3'              | REVERSE PRIMER 5' - 3'            |
|--------------------------------|-------------------------------------------------|-----------|----------------------------|-------------------------------------|-----------------------------------|
| <b>ARG1</b>                    | Arginase 1                                      | NM_007482 | SYBER                      | GAAAGTCCCAGATGTACCAGGAT             | CGATGTCTTTGGCAGATATGCA            |
| <b>CD64</b>                    | Fc receptor, igG, high affinity<br>             | NM_007482 | SYBER                      | GAAAGTCCCAGATGTACCAGGAT             | CGATGTCTTTGGCAGATATGCA            |
| <b>CD204</b>                   | Macrophage scavenger<br>receptor 1              | NM_031195 | SYBER                      | GGAGGAGAGAATCGAAAGCATT              | TCTGGAAGCGTTCCGTGTCT              |
| <b>COLLAGEN 1</b>              | Procollagen type 1                              | NM_007742 | 6- FAM ATCGACCCTAACCAAG    | GACTGGAAGAGCGGAGAGTACTG             | CCTTGATGGCGTCCAGGTT               |
| <b>COLLAGEN 3</b>              | Procollagen type 3                              | BC58724   | 6- FAM AATATCAAACACGCAAGGC | GGGAATGGAGCAAGACAGTCTT              | TGCGATATCTATGATGGGTAGTCTCA        |
| <b>COLLAGEN 4</b>              | Procollagen type 4                              | J04694    | 6- FAM CAGTGCCCTAACGGT     | GGCGGTACACAGTCAGACCAT               | GGAATAGCCGATCCACAGTGA             |
| <b>COLLAGEN 4A3</b>            | Collagen 4 alpha 3                              | NM_007734 | 6-FAM CCCTGAAGGAACACAGC    | ACCACGGCCATTCCTTCAT                 | CAAAAAGAAGAGAAAACCCACTATA<br>GAGT |
| <b>CTGF</b>                    | Connective tissue growth<br>factor              | BC006783  | 6- FAM ACTGCCTGGTCCAGAC    | GCTGCCTACCGACTGGAAGA                | CTTAGAACAGGCGCTCCACTCT            |
| <b>F4/80</b>                   | F4/80                                           | X93328    | SYBR                       | GGTACAGTCATCTCCCTGGTATGTCT          | GGTTCTGAACAGCACGACACA             |
| <b>FPR2</b>                    | Formyl peptide receptor 2                       | NM_008039 | 6-FAM TGTGTTCTGCATCCAGTC   | GCCTTGGACCGCTGCAT                   | TCACAGTGCCGTGGTTCTGA              |
| <b>FPR2</b>                    | Formyl peptide receptor 2                       | M88107    | 6-FAM CGCACAGTCACCACCAT    | TGGCTGGATTCGGATGA                   | AGGGCCAGGTTCCAGTAACA              |
| <b>ICAM1</b>                   | Intercellular adhesion<br>molecule 1            | NM_010493 | 6-FAM CCCTGGAAGTGCACG      | GGAGGTGGCGGAAAGTT                   | TCCAGCCGAGGACCATACAG              |
| <b>IL-1 beta</b>               | Interleukin 1 beta                              | M15131    | 6- FAM CTGAAAGCTCTCCACCTC  | TCGTGCTGTCGGACCCATA                 | TTGTTGGTTGATATTCTGTCCATTG         |
| <b>IL-6</b>                    | Interleukin 6                                   | NM_031168 | 6- FAM ATTGCCATTGCACAAC    | GGGAAATCGTGAAATGAGAAA               | AAGTGCATCATCGTTGTTTACATA          |
| <b>1L-10</b>                   | Interleukin 10                                  | NM_010548 | 6-FAM CATGGCCAGAAAT        | GATGCCCCAGGCAGAGAA                  | CACCCAGGGAATCAAATGC               |
| <b>MCP-1</b>                   | Monocyte chemoattractant<br>protein-1           | NM_011333 | 6- FAM AATGGGTCCAGACATAC   | GTCTGTGCTGACCCCAAGAAG               | TGGTTCGATCCAGGTTTTTA              |
| <b>p21</b>                     | Cyclin-dependent kinase<br>inhibitor 1A (p21)   | NM_007669 | 6-FAM AGAGCCACAGGCACC      | TCCACAGCGATATCCAGACATT              | CGGACATCACCAGGATTGG               |
| <b>NFKappaB p65<br/>(RelA)</b> | Transcription factor p65, also<br>known as RelA | M61909    | 6-FAM AGCTCAAGATCTGCCG     | TCTCACATCCGATTTTGTATAACC            | CGAGGCAGCTCCAGAGTT                |
| <b>p53</b>                     | Nuclear oncoprotein p53                         | AF151353  | 6-FAM TTTGTATCCCAGATATCTG  | CGTATCCGGGTGGAAGGAA                 | GGCGAAAAGTCTGCCTGTCT              |
| <b>PCNA</b>                    | Proliferating cell nuclear<br>antigen           | X53068    | 6- FAM CACAGCTGTACTCCTGTTC | TCAAGAGAAAAGTTTCCAGACTATGAA<br>ATGA | AAATTCACCAGATGGCATCTTTATT         |
| <b>PDGF</b>                    | Platelet derived growth<br>factor               | NM_011057 | 6- FAM TCGCGGAACCTC        | TGTAATCGCCGAGTGAAGA                 | CATTGCACATTGCGGTTATTG             |
| <b>PDGF REC B</b>              | Platelet derived growth<br>factor receptor beta | NM_008809 | 6- FAM CCACCATGAAAGTGG     | TCACGGTCTGAGCCATTCG                 | TCTGGCTGTCGATTCAGCAT              |

|                            |                                                      |           |                          |                          |                            |
|----------------------------|------------------------------------------------------|-----------|--------------------------|--------------------------|----------------------------|
| <b>RAGE</b>                | Advanced glycosylation end product specific receptor | NM_007425 | 6- FAM CACAGCCCGGATTG    | GCTGTAGCTGGTGGTCAGAACA   | CCCCTTACAGCTTAGCACAAGTG    |
| <b>SMA-alpha</b>           | Smooth muscle actin - alpha                          | NM_007392 | 6- FAM TGCCAGATCTTTTCC   | GACGCTGAAGTATCCGATAGAACA | GGCCACACGAAGCTCGTTAT       |
| <b>TGF-beta</b>            | Transforming growth factor - beta                    | NM_011577 | 6- FAM AAAGCCCTGTATTCCGT | GCAGTGGCTGAACCAAGGA      | GCAGTGAGCGCTGAATCGA        |
| <b>TGF-beta TYPE 1 REC</b> | Transforming growth factor - beta type 1 receptor    | D25540    | 6-FAM CATCACTAGATCGCCC   | CGTGTGCCAAATGAAGAGGAT    | AAGGTGGTGCCCTCTGAAATG      |
| <b>TNF-alpha</b>           | Tumor necrosis factor - alpha                        | NM_013693 | 6- FAM TCACCCACACCGTCAG  | GGCTGCCCCGACTACGT        | TTTCTCCTGGTATGAGATAGCAAATC |
| <b>TNFRSF11b</b>           | Tumour Necrosis Factor Receptor member 11b           | NM_008764 | 6-FAM CGAACCTCACCACAGAG  | GCGTGCAGCGGCATCT         | TCAATCTTCTGGGCTGATCTT      |
| <b>VCAM</b>                | vascular cell adhesion molecule-1                    | L22354    | 6-FAM CCAAATCCTGTGGAGCAG | CTGCTCAAGTGATGGGATACCA   | ATCGTCCCTTTTGTAGACATGAAG   |
| <b>VEGF</b>                | Vascular endothelial growth factor                   | M95200    | 6- FAM CTGTACCTCCACCATGC | GCACTGGACCCTGGCTTTACT    | ATGGGACTTCTGCTCTCCTTCTG    |

**TABLE S9. PROVIDED AS SEPARATE .XLS FILE**

## SUPPLEMENTAL REFERENCES

1. Borgeson E, Docherty NG, Murphy M, Rodgers K, Ryan A, O'Sullivan TP, Guiry PJ, Goldschmeding R, Higgins DF, Godson C. Lipoxin a(4) and benzo-lipoxin a(4) attenuate experimental renal fibrosis. *Faseb J*. 2011;25:2967-2979
2. Kantharidis P, Hagiwara S, Brennan E, McClelland AD. Study of microrna in diabetic nephropathy: Isolation, quantification and biological function. *Nephrology (Carlton)*. 2015;20:132-139
3. Brennan EP, Nolan KA, Borgeson E, Gough OS, McEvoy CM, Docherty NG, Higgins DF, Murphy M, Sadlier DM, Ali-Shah ST, Guiry PJ, Savage DA, Maxwell AP, Martin F, Godson C. Lipoxins attenuate renal fibrosis by inducing let-7c and suppressing tgfbetar1. *Journal of the American Society of Nephrology : JASN*. 2013;24:627-637
4. Chai Z, Dai A, Tu Y, Li J, Wu T, Wang Y, Hale LJ, Koentgen F, Thomas MC, Cooper ME. Genetic deletion of cell division autoantigen 1 retards diabetes-associated renal injury. *J Am Soc Nephrol*. 2013;24:1782-1792
5. Gray SP, Di Marco E, Kennedy K, Chew P, Okabe J, El-Osta A, Calkin AC, Biessen EA, Touyz RM, Cooper ME, Schmidt HH, Jandeleit-Dahm KA. Reactive oxygen species can provide atheroprotection via nox4-dependent inhibition of inflammation and vascular remodeling. *Arteriosclerosis, thrombosis, and vascular biology*. 2016;36:295-307
6. Jiang H, Lei R, Ding SW, Zhu S. Skewer: A fast and accurate adapter trimmer for next-generation sequencing paired-end reads. *BMC bioinformatics*. 2014;15:182
7. Dobin A, Davis CA, Schlesinger F, Drenkow J, Zaleski C, Jha S, Batut P, Chaisson M, Gingeras TR. Star: Ultrafast universal rna-seq aligner. *Bioinformatics*. 2013;29:15-21
8. Liao Y, Smyth GK, Shi W. Featurecounts: An efficient general purpose program for assigning sequence reads to genomic features. *Bioinformatics*. 2014;30:923-930
9. Robinson MD, McCarthy DJ, Smyth GK. Edger: A bioconductor package for differential expression analysis of digital gene expression data. *Bioinformatics*. 2010;26:139-140
10. Ju W, Nair V, Smith S, Zhu L, Shedden K, Song PX, Mariani LH, Eichinger FH, Berthier CC, Randolph A, Lai JY, Zhou Y, Hawkins JJ, Bitzer M, Sampson MG, Thier M, Solier C, Duran-Pacheco GC, Duchateau-Nguyen G, Essioux L, Schott B, Formentini I, Magnone MC, Bobadilla M, Cohen CD, Bagnasco SM, Barisoni L, Lv J, Zhang H, Wang HY, Brosius FC, Gadegbeku CA, Kretzler M, ErCb CPN, Consortium PK-I. Tissue transcriptome-driven identification of epidermal growth factor as a chronic kidney disease biomarker. *Science translational medicine*. 2015;7:316ra193
11. Hodgin JB, Nair V, Zhang H, Randolph A, Harris RC, Nelson RG, Weil EJ, Cavalcoli JD, Patel JM, Brosius FC, 3rd, Kretzler M. Identification of cross-species shared transcriptional networks of diabetic nephropathy in human and mouse glomeruli. *Diabetes*. 2013;62:299-308
